**Title: Epidemiology, clinical presentation and management of COVID-19 associated Mucormycosis: A single center experience from Pune, Western India.**

**Authors: Ameet Dravid MD <sup>1</sup>, Reema Kashiva MD <sup>2</sup>, Zafer Khan MD <sup>3</sup>, Balasaheb Bande <sup>3</sup>, Danish Memon MD <sup>2</sup>, Aparna Kodre MD <sup>2</sup>, Prashant Potdar MD <sup>2</sup>, Milind Mane MD <sup>3</sup>, Asir Tamboli MD <sup>3</sup>, Vishal Pawar MD <sup>3</sup>, Dattatraya Patil MD <sup>3</sup>, Debashis Banerjee MD <sup>3</sup>, Kailas Bhoite <sup>3</sup>, Akshay Shinde MD <sup>3</sup>, Reshma Pharande MBBS <sup>3</sup>, Suraj Kalyani MBBS <sup>3</sup>, Prathamesh Raut MBBS <sup>3</sup>, Madhura Bapte MD <sup>3</sup>, Charlotte Saldanha MD <sup>3</sup>, Dinesh Chandak MD <sup>3</sup>, Fouzia Ajani MD <sup>3</sup>, Anshul Mehta MBBS <sup>2</sup>, M Sateesh Reddy MBBS <sup>2</sup>, Krushnadas Bhayani MBBS <sup>2</sup>, S S Laxmi MBBS <sup>2</sup>, P D Vishnu MBBS <sup>2</sup>, Shipra Srivastava MBBS <sup>2</sup>, Shubham Khandelwal MBBS <sup>2</sup>, Sailee More MBBS <sup>2</sup>, Atif Shakeel MBBS <sup>2</sup>, Mohit Pawar MBBS <sup>2</sup>, Pranava Nande MBBS <sup>2</sup>, Amol Harshe MD <sup>4</sup>, Sagar Kadam MD <sup>5</sup>, Sudhir Hallikar MD <sup>6</sup>, Nudrat Kamal MD <sup>6</sup>, Danish Andrabi MD <sup>6</sup>, Sachin Bodhale MD <sup>7</sup>, Akshay Raut BDS <sup>8</sup>, Pushkar Gawande BDS <sup>8</sup>, Ankush Bhandari BDS <sup>8</sup>, Nilesh Wasmatkar MD <sup>9</sup>, Adnanali Sarkar MD <sup>9</sup>, Sangeeta Chandrashekhar MD <sup>9</sup>, Pallavi Butiyani MD <sup>9</sup>, Geetanjali Akhade MD <sup>9</sup>, Aditi Abnave MD <sup>9</sup>, Chandrashekhar Raman MD <sup>10</sup>, Siraj Basade MD <sup>10</sup>, Uma Mahajan M.Sc <sup>11</sup>, Gaurav Joshi MBA <sup>12</sup>, Dilip Mane MD <sup>2</sup>**

**Author Affiliations:**

1 – Department of Infectious diseases and HIV/AIDS, Noble hospitals and Research Centre, Pune, Maharashtra, India

2 – Department of Medicine, Noble hospital and Research Centre, Pune, Maharashtra, India

3 - Department of Critical Care Medicine, Noble hospital and Research Centre, Pune, Maharashtra, India

4 – Department of Pathology, Noble hospital and Research Centre, Pune, Maharashtra, India

5 - Department of Radiology, Noble hospital and Research Centre, Pune, Maharashtra, India

6 – Department of Otorhinolaryngology, Noble hospital and Research Centre, Pune, Maharashtra, India

29 7 – Department of Ophthalmology, Noble hospital and Research Centre, Pune, Maharashtra,  
30 India

31 8 - Department of Maxillo-facial surgery, Noble hospital and Research Centre, Pune,  
32 Maharashtra, India

33 9 - Department of Anesthesia, Noble hospital and Research Centre, Pune, Maharashtra, India

34 10- Department of Neurosurgery, Noble hospital and Research Centre, Pune, Maharashtra, India

35 11 – Statistician, VMK Diagnostics private limited, Pune, Maharashtra, India.

36 12 – Independent statistical consultant, Chicago, USA.

37

38 **Email addresses of authors:**

39 Ameet Dravid – [ameet.dravid@gmail.com](mailto:ameet.dravid@gmail.com), Reema Kashiva – [reemakashiva@gmail.com](mailto:reemakashiva@gmail.com), Zafer  
40 Khan – [zafer\\_a\\_khan@yahoo.co.in](mailto:zafer_a_khan@yahoo.co.in), Balasaheb Bande – [drbandebd@hotmail.com](mailto:drbandebd@hotmail.com), Danish  
41 Memon – [danish1331@yahoo.co.in](mailto:danish1331@yahoo.co.in), Aparna Kodre – [draparnankodre@gmail.com](mailto:draparnankodre@gmail.com), Prashant  
42 Potdar – [pashya2511@gmail.com](mailto:pashya2511@gmail.com), Milind Mane – [drmilind.mane@gmail.com](mailto:drmilind.mane@gmail.com), Asir Tamboli –  
43 [drasirtamboli@gmail.com](mailto:drasirtamboli@gmail.com), Vishal Pawar – [dr.vishal.d.pawar@gmail.com](mailto:dr.vishal.d.pawar@gmail.com), Dattatraya Patil –  
44 [drdattapatil05@gmail.com](mailto:drdattapatil05@gmail.com), Debashis Banerjee – [debaz2009@gmail.com](mailto:debaz2009@gmail.com) , Kailas Bhoite –  
45 [kailasbhoite1978@gmail.com](mailto:kailasbhoite1978@gmail.com), Akshay Shinde – [dr.akshay7@gmail.com](mailto:dr.akshay7@gmail.com), Reshma Pharande –  
46 [reshma.pharande97@gmail.com](mailto:reshma.pharande97@gmail.com), Suraj Kalyani – [surajkalyani@gmail.com](mailto:surajkalyani@gmail.com) , Prathamesh Raut –  
47 [rautlesh@gmail.com](mailto:rautlesh@gmail.com) , Madhura Bapte – [madhuraparth@gmail.com](mailto:madhuraparth@gmail.com), Charlotte Saldanha –  
48 [charlotte2491@gmail.com](mailto:charlotte2491@gmail.com), Dinesh Chandak – [dineshchandak444@gmail.com](mailto:dineshchandak444@gmail.com), Fouzia Ajani –  
49 [drfouziahirani@gmail.com](mailto:drfouziahirani@gmail.com), Anshul Mehta – [anshroks.25@gmail.com](mailto:anshroks.25@gmail.com) , M Sateesh Reddy –  
50 [satishat321@gmail.com](mailto:satishat321@gmail.com) , Krushnadas Bhayani – [kbhayani321@gmail.com](mailto:kbhayani321@gmail.com), S S Laxmi –  
51 [drsslakshmiatl@gmail.com](mailto:drsslakshmiatl@gmail.com) , P D Vishnu – [p.d\\_vishnu@yahoo.co.in](mailto:p.d_vishnu@yahoo.co.in), Shipra Srivastava –  
52 [srivastavashipra51@gmail.com](mailto:srivastavashipra51@gmail.com), Shubham Khandelwal – [shubh.joyrider@gmail.com](mailto:shubh.joyrider@gmail.com), Sailee  
53 More – [drsaileemore@gmail.com](mailto:drsaileemore@gmail.com), Atif Shakeel – [khanaatif009@gmail.com](mailto:khanaatif009@gmail.com) , Mohit Pawar –  
54 [mohitpawar2915@gmail.com](mailto:mohitpawar2915@gmail.com), Pranava Nande – [pranavanande4@gmail.com](mailto:pranavanande4@gmail.com), Amol Harshe –  
55 [dramolh@yahoo.co.in](mailto:dramolh@yahoo.co.in) , Sagar Kadam – [drsagarkadam@gmail.com](mailto:drsagarkadam@gmail.com) , Sudhir Halikar –  
56 [halikarsudhir@gmail.com](mailto:halikarsudhir@gmail.com), Nudrat Kamal- [nudratkamal86@gmail.com](mailto:nudratkamal86@gmail.com) , Danish Andrabi –  
57 [danish\\_andrabi@yahoo.co.in](mailto:danish_andrabi@yahoo.co.in), Sachin Bodhale – [drsrbl@gmail.com](mailto:drsrbl@gmail.com), Akshay Raut –  
58 [akshayraut8@gmail.com](mailto:akshayraut8@gmail.com), Pushkar Gawande – [gawandepushkar@gmail.com](mailto:gawandepushkar@gmail.com), Ankush Bhandari –

59 [dr.ankushbhandari@yahoo.com](mailto:dr.ankushbhandari@yahoo.com), Nilesh Wasmatkar – [drnileshkw@gmail.com](mailto:drnileshkw@gmail.com), Adnanali Sarkar  
60 – [adnansarkar2@gmail.com](mailto:adnansarkar2@gmail.com), Sangeeta Chandrashekhar – [drsangeet15@rediffmail.com](mailto:drsangeet15@rediffmail.com), Pallavi  
61 Butiyani – [pallavibutiyani@gmail.com](mailto:pallavibutiyani@gmail.com), Geetanjali Akhade – [dangat.geeta@gmail.com](mailto:dangat.geeta@gmail.com), Aditi  
62 Abnave – [abnaveaditi@gmail.com](mailto:abnaveaditi@gmail.com), Chandrashekhar Raman – [drshekhar71@hotmail.com](mailto:drshekhar71@hotmail.com), Siraj  
63 Basade - [siraj582@yahoo.com](mailto:siraj582@yahoo.com), Uma Mahajan – [umasmahajan@gmail.com](mailto:umasmahajan@gmail.com) , Gaurav Joshi –  
64 [gaurav.arun.joshi@gmail.com](mailto:gaurav.arun.joshi@gmail.com), Dilip Mane – [dileep.mane@yahoo.co.in](mailto:dileep.mane@yahoo.co.in).

65

66 **Corresponding Author** – Ameet Dravid, Email – [ameet.dravid@gmail.com](mailto:ameet.dravid@gmail.com)

67

### 68 **Abbreviations:**

69 Severe acute respiratory syndrome coronavirus 2 - SARS-CoV-2; coronavirus disease 2019-  
70 COVID-19; World health organization – WHO; COVID-19 associated Mucormycosis – CAM;  
71 C-reactive protein – CRP; lactate dehydrogenase – LDH; Interleukin – 6 - IL-6; Interferon  
72 Gamma - IFN- $\gamma$ ; diabetes mellitus - DM; Tocilizumab - TCZ; cytokine release syndrome - CRS;  
73 diabetic ketoacidosis - DKA; Rhino-orbito-cerebral mucormycosis - ROCM; Noble hospital and  
74 Research Centre - NHRC; High resolution computerized tomography scan - HRCT ; oxygen  
75 saturation - SpO<sub>2</sub> ; ratio of arterial partial pressure of oxygen to fraction of inspired oxygen-  
76 PaO<sub>2</sub>/FiO<sub>2</sub>; Functional endoscopic paranasal sinus surgery - FESS; Liposomal Amphotericin B -  
77 LAmB; reverse transcription PCR- RT-PCR; Intensive care unit - ICU; Central nervous system -  
78 CNS; institutional review board - IRB; interquartile range - IQR; absolute neutrophil count -  
79 ANC ; absolute lymphocyte count - ALC; Intravenous - IV; acute respiratory distress syndrome  
80 – ARDS.

81

82

83

84

85

86

87

88

89 **Abstract:**

90 **Background:** The second COVID-19 wave in India, triggered by the Delta variant, has been  
91 associated with an unprecedented increase in cases of COVID-19 associated  
92 Mucormycosis(CAM), mainly Rhino-orbito-cerebral mucormycosis(ROCM).The primary reason  
93 appears to be an unusual alignment of multiple risk factors in patients like prevalence of hypoxia,  
94 uncontrolled diabetes mellitus, indiscriminate use of steroids, high iron levels and immune  
95 dysfunction.

96 **Methods:** This retrospective cohort study was conducted at Noble hospital and Research Centre  
97 (NHRC), Pune, Western India between 1<sup>st</sup> April 2020 and 1<sup>st</sup> August 2021 to identify patients  
98 admitted with CAM. The primary endpoint was incidence of all cause mortality due to CAM.  
99 Secondary outcomes studied were need for mechanical ventilation and intensive care unit(ICU)  
100 admission. Baseline and time dependent risk factors significantly associated with death due to  
101 CAM were identified by Relative risk estimation.

102 **Results:** 59 patients were diagnosed with Mucormycosis at NHRC (58 ROCM, 1 Renal  
103 (disseminated) mucormycosis). Median age of the cohort was 52(IQR: 41,61) years and it  
104 included 20.3% females. Median duration from first positive COVID-19 RT PCR test to  
105 diagnosis of Mucormycosis was 17(IQR: 12,22) days. 90% patients were diabetic with 30%  
106 being newly diagnosed at the time of COVID-19 admission and 89% having uncontrolled sugar  
107 level (HbA1c > 7%). All patients were prescribed steroids during treatment for COVID-19. 56%  
108 patients were prescribed steroids for non-hypoxemic, mild COVID (irrational steroid therapy)  
109 while in 9%, steroids were indicated but were prescribed in inappropriately high dose. Majority  
110 of the patients were treated with a combination of surgical debridement(94%), intravenous  
111 Amphotericin B(91%) and concomitant oral Posaconazole therapy(95.4%). 74.6% patients were  
112 discharged after clinical and radiologic recovery while 25.4% (15 patients) died. On Relative risk  
113 analysis, CT severity score during COVID-19 admission  $\geq 18$  ( $p=0.017$ ), presence of orbital  
114 symptoms( $p=0.002$ ), presence of diabetic ketoacidosis( $p=0.011$ ) and cerebral involvement by  
115 Mucor( $p=0.0004$ ) were associated with increased risk of death. Duration of Amphotericin B  
116 therapy of  $\geq 21$  days was associated with statistically significant reduction in mortality( $p=0.002$ ).

117 **Conclusions:** CAM is an uncommon, rapidly progressive, angioinvasive, opportunistic fungal  
118 infection which is fatal if left untreated. Combination of surgical debridement and antifungal  
119 therapy leads to clinical and radiologic improvement in majority of cases.

120

121

122

123

124

125

126

127

128

129

130

131

132

133

134

135

136

137

138

139

140

141

142

## 143 **Introduction:**

144 In December 2019, Wuhan city, the capital of Hubei province in China, became the  
145 centre of an outbreak of viral pneumonia. By Jan 7, 2020, scientists had isolated a novel RNA,  
146 beta coronavirus from these patients. It was named severe acute respiratory syndrome  
147 coronavirus 2 (SARS-CoV-2) due to its sequence homology with SARS-COV-1<sup>[1]</sup>. The disease  
148 caused by SARS-COV-2 was later designated coronavirus disease 2019 (COVID-19) in  
149 February 2020, by World health organization (WHO)<sup>[2]</sup>. COVID-19 spread rapidly worldwide  
150 and India was no exception. By 1<sup>st</sup> August 2021, there have been more than 300 million  
151 infections and 0.4 million deaths due to COVID-19 in India<sup>[3]</sup>. With COVID-19, the incidence  
152 of secondary bacterial or fungal infections is 8%, with aspergillosis and candida being the most  
153 common fungi reported<sup>[4,5]</sup>. The second COVID wave in India (March 2021 – May 2021),  
154 triggered by the Delta variant, has also been associated with an unprecedented increase in the  
155 cases of COVID-19 associated Mucormycosis (CAM)<sup>[6,7]</sup>. Globally, the prevalence of  
156 mucormycosis varies from 0.005 to 1.7 per million population, while its prevalence is nearly 80  
157 times higher (0.14 per 1000) in India as per a recent estimate of year 2019-2020<sup>[7-9]</sup>. Thus, India  
158 already had the highest cases of mucormycosis in the world and the incidence increased  
159 exponentially during the second COVID wave. As of August 1<sup>st</sup>, 2021, 45,374 cases of CAM  
160 have been reported in India<sup>[6]</sup>.

161 CAM is an uncommon, rapidly progressive, angio-invasive, commonly fatal,  
162 opportunistic fungal infection<sup>[9]</sup>. Unusual alignment of multiple risk factors could be associated  
163 with sudden spurt of CAM in India<sup>[10]</sup>. Dysregulated immune response in COVID-19  
164 characterized by exuberant activation of innate immune system, elevation in systemic  
165 inflammatory markers (C-reactive protein (CRP), ferritin, lactate dehydrogenase (LDH) and D-  
166 dimer), aberrant pro-inflammatory cytokine secretion (Interleukin – 6 (IL-6), soluble IL-2  
167 receptor [IL-2R], IL-10, TNF- $\alpha$ ) by alveolar macrophages and depleted adaptive immune  
168 response (decline in CD4+ T cell, CD8+ T cell, Natural killer cell and decreased Interferon  
169 Gamma (IFN- $\gamma$ ) expression in CD4+ T cells) could be one of the factors predisposing individuals  
170 to CAM<sup>[11,12]</sup>. In these patients, the activation of antiviral immunity to SARS-CoV-2 may,  
171 paradoxically, potentiate an inflammatory phenotype and thus may favor secondary infections. In  
172 addition, India has the second largest population with diabetes mellitus (DM) in the world (77

173 million people with diabetes, with a nationwide prevalence of 7.3 %.)<sup>[13, 14]</sup>. SARS-CoV-2 has  
174 been shown to affect the beta cells of the pancreas, resulting in metabolic derangement, possibly  
175 causing diabetes mellitus <sup>[15]</sup>. Uncontrolled DM is a risk factor for both, COVID-19 and  
176 Mucormycosis. Steroids, namely Dexamethasone and Methylprednisolone have been extensively  
177 used to resolve hyperinflammation and inflammatory lung damage in severe COVID-19 <sup>[16-18]</sup>.  
178 But use of steroids can cause hyperglycemia, suppression of several polymorphonuclear (PMN)  
179 leucocyte functions, impairment of phagocytosis by resident macrophages, depletion of T cell  
180 immunity <sup>[10]</sup> and increase risk of Mucormycosis. Indiscriminate use of steroids in patients with  
181 mild or asymptomatic COVID-19 can be counter-productive and make the person susceptible to  
182 opportunistic fungi <sup>[19]</sup>. Use of immunomodulator therapy like Tocilizumab (TCZ, IL-6 receptor  
183 inhibitor) in combination with steroids for Cytokine release syndrome (CRS, cytokine storm)  
184 could further aggravate immunosuppression and facilitate breakthrough fungal infection <sup>[20]</sup>.  
185 Thus, the primary reason for this sudden increase in CAM in India appears to be germination of  
186 Mucorales spores in an ideal environment of low oxygen (hypoxia), high glucose (diabetes  
187 mellitus, new onset hyperglycemia, impaired fasting glucose or steroid-induced hyperglycemia),  
188 acidic environment<sup>[10]</sup> (metabolic acidosis, diabetic ketoacidosis [DKA]), high iron levels (hyper-  
189 ferritinemia characteristic of COVID-19 leading to excess intracellular iron that generates  
190 reactive oxygen species and resultant death of cells with acidosis facilitating free iron release for  
191 mucor germination) <sup>[21,22]</sup> and immune dysfunction (mediated by Delta variant of SARS COV-2,  
192 steroid therapy or background co-morbidities).

193 The most common form of Mucormycosis seen in India during the COVID-19 pandemic  
194 was the Rhino-orbito-cerebral (ROCM) one but cases of pulmonary <sup>[7,23]</sup> or disseminated  
195 mucormycosis <sup>[24]</sup> have also been reported. Suspected ROCM requires urgent intervention,  
196 because of the often rapidly progressive and destructive nature of the infection. Delayed  
197 initiation of therapy is associated with increased mortality <sup>[25,26]</sup>. Despite treatment, case-fatality  
198 rates due to mucormycosis during the pre-COVID-19 pandemic era were already high, ranging  
199 from 32% to 70%, according to organ involvement <sup>[25,26]</sup>. However, in SARS-CoV-2 infection,  
200 the mortality maybe even higher. Maximizing survival rates requires rapid diagnostic and  
201 therapeutic intervention, including immediate involvement of a multidisciplinary medical,  
202 surgical, radiological, and laboratory-based team. Multiple case reports <sup>[27-50]</sup> and retrospective

203 cohort studies <sup>[7, 51-61]</sup> of CAM from India and other countries have already been published.  
204 However, detailed epidemiology, risk factor analysis, surgical and medical treatment  
205 administered, outcomes and complications (especially long-term complications) developing in  
206 these patients has been scarcely reported <sup>[7,52,57]</sup>. In addition, lack of imaging modalities in rural  
207 areas of India, inability to identify early symptoms by general practitioners, shortage of  
208 antifungal drugs (especially Liposomal Amphotericin B) during second COVID wave and  
209 inadequate number of specialists to perform complex endoscopic, orbital and skull base surgeries  
210 <sup>[7,10]</sup> posed a serious challenge in tackling rising ROCM cases in India and led to a high mortality  
211 in certain cohort studies <sup>[7,52]</sup>. As a result, we planned this retrospective observational cohort  
212 study aimed at understanding the epidemiology, clinical presentation, outcomes and long-term  
213 complications in patients with CAM admitted at our tertiary level hospital in Pune, Western  
214 India during the COVID-19 pandemic.

## 215 **Methods:**

### 216 **Study Setting:**

217 This retrospective cohort study was conducted at Noble hospital and Research Centre  
218 (NHRC), Pune, Western India. NHRC is a tertiary level private hospital designated for clinical  
219 management of COVID-19 patients and management of post COVID complications since 23<sup>rd</sup>  
220 March 2020. Pune is located in the state of Maharashtra, Western India and was one of the  
221 epicenters of COVID-19 epidemic in India. As of 1<sup>st</sup> August 2021, Maharashtra state has  
222 reported more than 6.3 million cases of COVID-19 and more than 133,000 deaths <sup>[3]</sup>. Till 1<sup>st</sup>  
223 August 2021, NHRC has admitted 5439 COVID-19 patients with 391 deaths. Maharashtra state  
224 has also reported more than 5000 cases of COVID-19 associated Mucormycosis (CAM) till 1<sup>st</sup>  
225 August 2021<sup>[6]</sup>.

226 NHRC provides clinical care, diagnostic and treatment services to patients at a subsidized  
227 cost. Data of all hospitalized patients is entered into an electronic database (Lifeline electronic  
228 database, Manorama infosystems, Kolhapur, India).

### 229 **Study Population:**

230 Patients were eligible for inclusion in this analysis if they were admitted to NHRC  
231 between 1<sup>st</sup> April 2020 and 1<sup>st</sup> August 2021 and were diagnosed with COVID-19 associated  
232 Mucormycosis (CAM). COVID-19 diagnosis was made in patients who tested positive for SARS



233 COV 2 RNA in respiratory specimens by reverse transcription PCR (RT-PCR) or a positive rapid  
234 antigen test. Mucormycosis was identified in patients having compatible clinical and radiologic  
235 manifestations and demonstration of fungi in the tissue or sterile body fluids by either direct  
236 microscopic visualization of broad ribbon-like aseptate hyphae (potassium hydroxide (KOH)  
237 mount or Calcofluor stain) , culture isolation of Mucorales (Sabouraud dextrose agar) or  
238 Histopathology examination of affected tissue showing Mucor species (Hematoxylin and eosin,  
239 periodic acid Schiff, or Gomori methenamine silver stain) <sup>[9]</sup>. CAM was defined as development  
240 of Mucormycosis within 3 months of diagnosis of COVID-19.

241 Data was obtained from electronic health record of each individual admitted for treatment  
242 of CAM in NHRC by manual abstraction. It included hospitalization dates, demographics, co-  
243 morbidities, severity of associated COVID-19 illness, treatment received for COVID-19  
244 including steroids and immunomodulator therapy, presenting symptoms of Mucormycosis,  
245 clinical examination data, anatomic site of involvement, diagnostic modalities including  
246 microscopy, culture, or histopathology, laboratory investigation data (including inflammatory  
247 markers), microbiology reports, imaging reports (High resolution computerized tomography scan  
248 of chest, paranasal sinuses and brain (HRCT chest, CT PNS and CT brain)), treatment details,  
249 including antifungal drug therapy and surgical debridement, data on use of supplemental oxygen,  
250 mechanical ventilation and hospitalization outcomes. Mild COVID was defined as individuals  
251 who have various signs and symptoms of COVID-19 but who do not have shortness of breath,  
252 dyspnea, or abnormal chest imaging <sup>[62]</sup>. Moderate disease was defined as patients who show  
253 evidence of lower respiratory disease during clinical assessment or imaging and who have  
254 oxygen saturation (SpO<sub>2</sub>) 90 to ≤ 93% on room air. Severe COVID was defined as SpO<sub>2</sub> < 90%  
255 on room air, a ratio of arterial partial pressure of oxygen to fraction of inspired oxygen  
256 (PaO<sub>2</sub>/FiO<sub>2</sub>) < 300 mm Hg, respiratory frequency > 30 breaths/min or lung infiltrates >50% <sup>[62]</sup>.  
257 Critical COVID was defined as presentation with respiratory failure, septic shock, and/or  
258 multiple organ dysfunction. For all patients diagnosed with CAM, we also scrutinized inpatient  
259 case files until hospital discharge, death, or 1<sup>st</sup> September 2021—the date on which the database  
260 was locked—whichever happened first. Systemic complications developing in patients during  
261 hospital admission were also noted. All patients who died due to CAM during hospital admission  
262 were identified and a death audit to look for complications and cause of death was undertaken.

263 For patients who left the hospital against medical advice, we considered a worst-case scenario  
264 for mortality analysis and assumed the patients died. All patients who recovered, got discharged  
265 from NHRC and had outpatient follow-up at 15, 30 and 90 days after discharge were identified.  
266 Their outpatient follow-up visits were traced from electronic database to look for delayed  
267 complications.

### 268 **Management of Mucormycosis at NHRC:**

269 NHRC protocol for management of Mucormycosis has been developed after careful  
270 consideration of current global and national guidelines <sup>[63,64]</sup>. As per the protocol, early, radical,  
271 surgical debridement of affected site in addition to combination systemic antifungal therapy was  
272 utilized for treatment.

### 273 **Surgical management:**

274 Functional endoscopic paranasal sinus surgery (FESS) with debridement of necrosed and  
275 diseased sinus tissue and orbital decompression was the most common surgical procedure  
276 performed in patients with ROCM. All efforts were made to preserve the eye for as long as  
277 possible in view of role of eye to not only provide vision but also its removal causing significant  
278 psycho-social problems to patient. In patients with total blindness, proptosis, fixed pupil and  
279 eyeball, imaging evidence of orbital involvement by Mucor (globe/muscles/fat) and/or  
280 intracranial spread (superior orbital fissure/inferior orbital fissure involvement), surgical  
281 exenteration of the eye was performed <sup>[65]</sup>. Surgical exenteration of the eye with debridement of  
282 orbital cavity was performed in consultation with Department of Otorhinolaryngology and  
283 Ophthalmology. Partial or total maxillectomy was performed in patients with evidence of  
284 osteomyelitis of maxilla or alveolar arch. Neurosurgery was performed in case of intracranial  
285 spread of disease with involvement of skull base or formation of basi-frontal lobe brain abscess.

### 286 **Medical management:**

287 Combination therapy of Liposomal Amphotericin B (LAmB) and Oral Triazole  
288 (predominantly oral Posaconazole) was the most common medical treatment offered to all  
289 patients with CAM. LAmB was initiated at the dose of 5 mg/kg. The dose was increased to 10  
290 mg/kg in case of intracranial spread <sup>[63,64]</sup>. In the scenario of shortage of LAmB due to surge in  
291 CAM cases or non affordability of patient, other formulations of Amphotericin B (Amphotericin  
292 B lipid complex (5 mg/kg), Amphotericin B lipid emulsion (5 mg/kg) and Amphotericin B de-

293 oxycholate (1 mg/kg)) were used for patients. The duration of Amphotericin B treatment was  
294 decided depending on the site of involvement (3 weeks for only paranasal sinus involvement, 4  
295 weeks for orbital, lung and disseminated Mucormycosis and 6 weeks for Central nervous system  
296 (CNS) Mucormycosis). Oral Posaconazole (delayed release tablets, 300 mg twice a day on Day 1  
297 and then 300 mg once a day) was started along with Amphotericin B treatment and continued  
298 after discharge from hospital for a period of 1 to 3 months depending on local control of disease  
299 and discretion of Infectious disease physician. In patients with concomitant chronic kidney  
300 disease, intravenous Posaconazole or Isavuconazole followed by step-down to oral therapy was  
301 treatment of choice. Serum Posaconazole levels were performed to guide dosage during oral  
302 therapy.

### 303 **Outcomes:**

304 Primary endpoint:

305 1) Deaths in the cohort due to CAM.

306 Secondary outcomes:

307 2) Number of patients who had a clinical and radiologic recovery and were discharged from  
308 hospital.

309 3) Patients who required mechanical ventilation (noninvasive or invasive) and Intensive care  
310 unit (ICU) admission for CAM.

311 4) Incidence of systemic complications (including long-term complications) in patients after  
312 starting Amphotericin B therapy.

313 The use of database for clinical research was approved by the institutional review board  
314 (IRB) of Noble hospital and Research Centre, Pune, India.

### 315 **Statistical Methods:**

316 Continuous variables were summarized using median and interquartile range (IQR),  
317 while categorical variables were summarized using frequency and percentages. Continuous  
318 variables were compared using a Mann Whitney U test. Categorical variables were compared  
319 using Chi-square test, Proportion test and Fishers' exact test. Baseline and time dependent risk  
320 factors significantly associated with death due to CAM were identified by Relative risk analysis.  
321 Baseline risk factors included for analysis were age (< 60 years or  $\geq$  60 years), gender, severity of  
322 baseline COVID disease (CT severity index  $\geq$  18 versus < 18), presence of orbital or central

323 nervous system (CNS) symptoms, presence of diabetic keto-acidosis, presence of intracranial  
324 spread (cerebral involvement) and baseline investigations like absolute lymphocyte count (<  
325 1000 versus  $\geq$  1000 cells/mm<sup>3</sup>), C reactive protein ( $\geq$  50 versus < 50 mg/L), D-dimer ( $\geq$  252  
326 versus < 252 mcg/mL) and Ferritin ( $\geq$  1000 versus < 1000 mcg/L). Time dependent risk factors  
327 included duration of Amphotericin B therapy (< 3 weeks versus  $\geq$  3 weeks) and development of  
328 systemic complications like acute kidney injury, hepatitis, anemia, thrombocytopenia,  
329 osteomyelitis and CNS complications (stroke or cerebritis). The p value  $\leq$  0.05 was considered as  
330 statistically significant. All data was analyzed by SPSS version 12.0.

### 331 **Results:**

332 During the period between 1<sup>st</sup> April 2020 to 1<sup>st</sup> August 2021, 59 patients were diagnosed  
333 with Mucormycosis at NHRC. Fifty-eight patients were diagnosed to have ROCM while 1  
334 patient was diagnosed to have Renal (disseminated) mucormycosis. Median age of the cohort  
335 was 52 (IQR: 41, 61) years and it included 20.3 % (12/59) females. Seventeen (28.8 %) patients  
336 were > 60 years of age. Fifty-six (95 %) patients had pre-existing or newly diagnosed co-  
337 morbidities. Diabetes mellitus (53/59, 89.8 %) was the most common co-morbidity seen in our  
338 cohort. Of these, 15 patients (28.3 %) were newly diagnosed with diabetes during hospital  
339 admission for COVID-19. Two patients were diagnosed to have impaired fasting glucose  
340 (Fasting blood glucose between 110 and 125 mg/dl). Preexisting co-morbidities observed in  
341 patients at admission are enumerated in Table 1. Three patients (5.1%) had no co-morbidities  
342 prior to developing CAM.

343 Clinically, 16 patients (27.1%) had mild COVID, 29 (49.2 %) had moderate COVID and  
344 14 patients (23.7%) had severe or critical COVID disease prior to diagnosis of Mucormycosis.  
345 All 59 patients underwent High resolution CT (HRCT) imaging of chest (GE Optima, 128 slice  
346 CT scanner) during admission for COVID-19 and median CT severity index was 12 (IQR:  
347 8,14.5). CT severity index <sup>[66]</sup> indicated mild disease (CT severity index: < 8) in 18.6 % (11/59),  
348 moderate disease (CT severity index: 8-14) in 56 % (33/59) and severe disease (CT severity  
349 index: 15-25) in 25.4 % (15/59) of patients. Treatments given during COVID-19 admission are  
350 enumerated in Table 2a and 2b. Remdesivir was prescribed to 67.8 % (40/59), intravenous and/or  
351 oral steroids were prescribed to 100 % and Immune-modulator therapy (Tocilizumab - 5,  
352 Baricitinib-2, Idofinib- 1, Infliximab- 2, Bevacizumab - 2 and Itolizumab - 1) was prescribed to

353 22 % (13/59) patients in our cohort. Methylprednisolone was the commonest prescribed steroid  
354 (54 patients, 91.5%, Table 2b). Most commonly prescribed dose of Methylprednisolone was 1-2  
355 mg/kg/day in divided doses for 5 to 10 days <sup>[67]</sup>. Ten patients (16.9 %) were prescribed 2  
356 different steroids during treatment course for COVID-19. 56 % (33/59) patients were prescribed  
357 steroids in the absence of hypoxia (irrational or unscientific steroid use). In 5 (5/54, 9.3%)  
358 patients, Methylprednisolone dose of more than 2 mg/kg/day was prescribed for treatment of  
359 severe COVID-19 (wrong or excess steroid dose). Eleven patients (18.6%) required ICU  
360 admission while 7 (11.9 %) needed noninvasive or invasive ventilation during hospital admission  
361 of COVID-19 infection. Thirteen patients (22%) had received COVID vaccination prior to  
362 admission (3 patients received 2 vaccine doses and 10 patients received single vaccine dose,  
363 Table 1). Five patients (8.5 %) were treated for COVID-19 while in home quarantine and did not  
364 require hospital admission. All 5 patients in home quarantine received steroids (irrational or  
365 unscientific steroid use) as a part for of their treatment regimen. Median duration of hospital  
366 admission for COVID-19 was 9 (IQR: 6, 14) days.

367 Median duration from first positive COVID-19 RT PCR test to diagnosis of  
368 Mucormycosis was 17 (IQR: 12, 22) days. Duration was less than 14 days for 22 (37.3 %, early  
369 CAM) patients while it was > 14 days for 37 (62.7 %, late CAM) patients. Median duration  
370 between hospital discharge for COVID-19 to re-admission for Mucormycosis was 7 (IQR: 2.5,  
371 15.5) days. Twenty patients (33.9 %) were diagnosed to have Mucormycosis (suspected fungal  
372 sinusitis, ROCM) during admission for COVID-19. Twenty-seven (45.7 %) were re-admitted  
373 less than 14 days after hospital discharge for COVID-19 while 12 (20.4 %) were re-admitted  
374 after more than 14 days. Headache (43/58, 74.1 %), hemi-facial pain predominantly maxillary  
375 pain (42/58, 72.4 %) and facial swelling (33/58, 56.9 %) were the three commonest presenting  
376 symptoms of ROCM in our cohort (Table 3). Median duration of symptoms was 6 (IQR: 3, 8.5)  
377 days. Seven patients (11.9 %) had symptoms for more than 2 weeks prior to diagnosis of ROCM.  
378 Fifty-eight patients (99%) had rhinal (paranasal sinus) involvement, 33 (56%) had orbital  
379 (eyeball, extra-ocular muscles or orbital cavity) and 26 (44.1%) had cerebral involvement  
380 (infarcts, cavernous sinus involvement, dural enhancement, frontal lobe abscess, osteomyelitis  
381 and erosion of frontal bone, Table 3). Palatal involvement (palatal necrosis, black eschar or  
382 palatal osteomyelitis) was observed in 13 (22 %) patients. Median hemoglobin value at diagnosis

383 of Mucormycosis was 13.4 (IQR: 11.4, 14.5) mg/dl (Table 4). Median absolute neutrophil count  
384 (ANC) was 8100 (IQR: 5248, 11475) cells/mm<sup>3</sup> and median absolute lymphocyte count (ALC)  
385 was 1350 (IQR: 1010, 1750) cells/mm<sup>3</sup>. Fourteen patients (24.6 %) had ALC < 1000 cells/mm<sup>3</sup>  
386 while no patient had ANC < 1000 cells/mm<sup>3</sup> at admission. Median CRP at admission was 84.7  
387 (IQR: 41,167, 45 patients) mg/L, median D-dimer was 483.5 (IQR: 253.7,1201, 37 patients)  
388 mcg/mL, and median Ferritin value was 857.1 (IQR: 280.5, 1429, 32 patients) mcg/L. Thirteen  
389 patients (40.6 %) had serum Ferritin level > 1000 mcg/L at admission while 11 patients had D-  
390 dimer > 1000 mcg/mL. Median HbA1C level in our cohort was 9.3 (IQR: 8, 12). Ten patients  
391 (10/53, 18.9%) presented with diabetic ketoacidosis. Diagnosis of Mucormycosis was made by  
392 KOH/calcofluor white staining of nasal scrapings (25/59, 42.4%), culture (5/59, 8.5%) and  
393 histopathologic examination of excised tissue from paranasal sinuses (57/59, 96.6%). Mixed  
394 mould infection (mucormycosis and aspergillosis) was observed in 3 patients.

395 Aggressive surgical debridement of involved site and combination antifungal therapy was  
396 standard of care for all ROCM patients in our cohort. Empirical combination anti-fungal therapy  
397 was started after radiologic evidence of invasive sinusitis, pending confirmatory diagnosis by  
398 histopathology or culture. Various treatment modalities used in our cohort are mentioned in  
399 Table 5. Intravenous (IV) formulations of Amphotericin B (Liposomal, Lipid-complex, Lipid  
400 emulsion or Deoxycholate) were the mainstay of antifungal therapy and prescribed to 91.5%  
401 (54/59) patients. In view of shortage of Liposomal Amphotericin B in India during the second  
402 COVID-19 wave, patients ended up getting a combination of Amphotericin B formulations as  
403 per availability. Liposomal Amphotericin B was prescribed to 89.8 % (53/59) patients for a  
404 median duration of 15 (IQR: 11, 21) days. Amphotericin B de-oxycholate or Conventional  
405 Amphotericin B was prescribed to 45.8% (27/59) patients for a median duration of 4 (IQR: 3, 9)  
406 days. The median duration of Amphotericin B exposure to patients in our cohort was 21 (IQR:  
407 14, 27) days. All patients were also prescribed concomitant oral triazole therapy (Posaconazole  
408 (58/59, 98.3%) or Isavuconazole (5/59, 8.5%)) during admission and after discharge till clinician  
409 was satisfied about local control of disease. Median duration for oral triazole therapy was 60  
410 days. FESS with orbital decompression was performed on 94.9 % patients (56/59). Surgical  
411 exenteration of the eye with debridement of orbital cavity was performed in 13 (22 %) patients.  
412 Partial maxillectomy was performed in 9 (15.3 %) patients while Neurosurgery for frontal lobe

413 brain abscess drainage was performed in 5 (8.5 %) patients. Eight patients (13.6 %) required  
414 invasive mechanical ventilation while 18 (30.5 %) required ICU admission for Mucormycosis.

415 Complications during antifungal therapy and hospital admission are mentioned in Table  
416 6. Fever with chills (78 %), Thrombophlebitis (59.3 %), Hypokalemia (88.1 %), Anemia (57.6  
417 %) and Nephrotoxicity (50.8 %) were the most common complications observed during hospital  
418 admission. Central nervous system (CNS) complications (stroke/cerebritis/brain abscess) were  
419 seen in 25.4 % patients. There were 14 deaths (23.7 %) in our cohort during first hospital  
420 admission for Mucormycosis. On Relative risk analysis, CT severity score during COVID-19  
421 admission  $\geq 18$  ( $p = 0.017$ ), presence of symptoms like eye swelling ( $p = 0.002$ ), loss of vision ( $p$   
422  $< 0.0001$ ), ptosis ( $p = 0.005$ ) and limb weakness ( $p = 0.001$ ), presence of diabetic ketoacidosis ( $p$   
423  $= 0.011$ ), cerebral involvement by Mucor ( $p = 0.0004$ ) and development of CNS complications  
424 like stroke ( $p < 0.0001$ ) during antifungal therapy were associated with increased risk of death  
425 (Table 7, Figure 1). Duration of Amphotericin B treatment of more than 21 days was associated  
426 with decreased risk of death ( $p = 0.002$ ) on Relative risk analysis (Table 7). All patients who  
427 were discharged from hospital were followed up for a minimum period of 6 weeks to look for  
428 late complications. Three patients needed re-admission, 48, 54 and 37 days after first discharge  
429 in view of re-appearance of symptoms and/or imaging evidence of progression of disease to the  
430 CNS. All 3 patients needed repeat surgical debridement and additional Amphotericin B  
431 treatment. They were successfully discharged the second time. Two patients also needed re-  
432 admission for osteomyelitis of maxilla and alveolar arch which needed partial maxillectomy and  
433 placement of dental prosthesis. One patient who had undergone exentration of eye was  
434 readmitted 90 days later for insertion of orbital prosthesis. One patient who had been treated for  
435 cerebral mucormycosis (bilateral complete vision loss and multiple cerebral infarcts) with 42  
436 days of high dose Liposomal Amphotericin B and Posaconazole was readmitted with aspiration  
437 pneumonia 12 days later and died. Cause of death was respiratory failure due to aspiration  
438 pneumonia and acute respiratory distress syndrome (ARDS, Total deaths in cohort - 15, 25.4%).

### 439 **Discussion:**

440 We conducted a single-centre, retrospective cohort study of 59 patients with CAM who  
441 were admitted at NHRC in the last 15 months. 74.6% patients could be successfully discharged

442 after control of disease with combined surgical and medical approach. Mortality rate in our  
443 cohort at 6 weeks follow-up was 25.4 %.

444 Majority of the patients in our study were middle-aged (median age: 52□years), of which  
445 nearly two-thirds were male. It has been hypothesized that the effect of estrogen might be  
446 protective in systemic fungal infection, which could have led to lower incidence in females <sup>[68]</sup>.  
447 Case series on CAM by Sharma et al <sup>[46]</sup>, described diabetes as a risk factor in 90% cases of  
448 which 52% had uncontrolled disease. A systematic review of 101 cases of CAM by Singh et al  
449 <sup>[58]</sup> also noted that more than 80% cases had either pre-existing or new onset hyperglycaemia as a  
450 risk factor. Our study has demonstrated similar findings in that 90 % of included patients were  
451 diabetic with almost 30% being newly diagnosed with DM at the time of admission for COVID-  
452 19. Of the 56 patients who had HbA1c value available, 50 had uncontrolled DM (HbA1c > 7%).  
453 Median HbA1c in our cohort was 9.3% while it was 9.6% in the study by Sen et al <sup>[55]</sup>. Tight  
454 control of blood sugar level among patients with Diabetes Mellitus/ COVID-19 co-infection  
455 could help in reducing incidence of ROCM.

456 Both the RECOVERY trial <sup>[17]</sup> and WHO COVID-19 <sup>[69]</sup> guidelines clearly recommend  
457 against usage of Corticosteroids in COVID-19 patients not requiring oxygen (absence of  
458 hypoxia). Despite that, indiscriminate use of steroids in mild COVID-19 continues in India. The  
459 underlying reasons include the sudden surge of cases during second COVID wave leading to  
460 panic among general practitioners, inadequate time for triaging patients in busy outpatient  
461 clinics, non evidence-based clinical practice, availability of over the counter steroids, shortage of  
462 hospital beds and inadequate monitoring of the patients taking steroids. The improper use of  
463 corticosteroids has been identified as an independent risk factor for CAM by the MucoCovi  
464 network <sup>[7]</sup>. In their retrospective analysis of 187 Indian CAM patients, they found that 78%  
465 (150/187) had received steroid therapy but only 33% patients had received steroids at appropriate  
466 dosages. In 33 % patients (50/150), steroids were not indicated while among 30% (45/150)  
467 patients steroids were indicated but were prescribed in inappropriately high dose <sup>[7]</sup>. In  
468 comparison, in our study, 56 % patients were prescribed steroids for non-hypoxemic, mild to  
469 moderate COVID illness (irrational steroid therapy) while in 8.5 % patients steroids were  
470 indicated but were prescribed in inappropriately high dose. Thus there is an urgent need to stop



471 prescription of steroids in non-hypoxemic COVID-19 patients and to limit the dose and duration  
472 of steroids in hypoxic patients.

473 In our cohort, majority of the patients were treated with a combination of surgical  
474 debridement (94%) and intravenous Amphotericin B therapy (91%). Mortality rate at 6 weeks  
475 follow-up was 25.4 % which is lower than what is reported by Pal et al <sup>[57]</sup> and Patel et al  
476 (MucoCovi network - 6 week mortality rate of 38.3 % and 12 week mortality of 45.7 %) <sup>[7]</sup>.  
477 Reasons for lower mortality in our cohort as compared to the MucoCovi network <sup>[7]</sup> could be  
478 relatively younger population (median age 52 years versus 56.9 years), lower prevalence of  
479 hypoxia during COVID-19 (44 % versus 56 %), lower pulmonary involvement due to  
480 Mucormycosis (0 % versus 8.6 %), increased use of combination antifungal therapy (91% versus  
481 50%) and higher use of combined surgical and medical approach (91% versus 71%). However,  
482 presence of diabetic ketoacidosis (10.9 % versus 8.6 %) and prevalence of cerebral involvement  
483 due to Mucor (44 % versus 23 %) was higher in our cohort than the MucoCovi study <sup>[7]</sup>. Both the  
484 factors, presence of diabetic ketoacidosis ( $p = 0.011$ ) and cerebral involvement with Mucor ( $p =$   
485  $0.0004$ ) were associated with higher risk of mortality on Relative risk analysis. In patients with  
486 cerebral involvement due to Mucor, mortality rate was 50% which is 5 times higher than among  
487 patients without cerebral involvement. On the other hand, duration of Amphotericin B therapy of  
488 more than 21 days was associated with statistically significant reduction in mortality ( $p = 0.002$ ).  
489 Development of ROCM while the patient is still under active treatment for moderate or severe  
490 COVID-19 may pose significant challenges in the management – specifically termination of  
491 corticosteroids, and surgery under general anesthesia. This was reflected in the CT severity index  
492  $> 18$  (depicting severe COVID pneumonia) being a significant risk factor for increased risk of  
493 death due to CAM ( $p = 0.017$ ). Patients with ROCM also remain at risk for delayed  
494 complications and may need re-admission with further surgical and anti-fungal treatment to  
495 resolve them.

#### 496 **Limitations:**

497 Our study has several limitations. First, this is not a randomized controlled trial, and  
498 therefore unmeasured confounding cannot be ruled out. Second, as for all retrospective studies,  
499 some individuals diagnosed with Mucormycosis may be unreported leading to measurement bias  
500 and underestimation of mortality due to CAM. Third, we collected data from a single centre in

501 India unlike other multicenter cohort studies [7, 52,54,55,57]. Fourth, an overwhelmed health care  
502 system, inadequate workforce and lack of exhaustive reporting due to surge of cases during  
503 second COVID wave could be responsible for underestimation of co-morbidities, presenting  
504 symptoms and complications amongst patients in our cohort. Fifth, inflammatory markers like  
505 Ferritin, CRP and D-dimer were not available for all patients in the cohort. Sixth, we did not look  
506 for environmental factors causing healthcare-associated mucormycosis like contaminated  
507 ventilation systems, air conditioners, and ongoing construction in our hospital. We did not  
508 estimate the burden of Mucormycetes spores in our hospital environment. We also didn't  
509 investigate the link between risk factors like use of industrial oxygen during the COVID  
510 pandemic, contaminated nebulizer fluids or inline humidifier tubing used in ventilator circuits  
511 and contaminated oxygen delivery systems with increased incidence of CAM in our cohort [10].  
512 Seventh, other unexplored factors, including genetic predisposition were not identified.

513         Despite these limitations, this retrospective cohort study adds to the growing body of  
514 literature on epidemiology, management strategies, outcomes and long term complications due to  
515 COVID-19 associated Mucormycosis (CAM).

### 516 **Conclusions:**

517         COVID-19 associated Mucormycosis (CAM) is an uncommon, rapidly progressive,  
518 angio-invasive, opportunistic fungal infection which is fatal if left untreated. The most common  
519 form of CAM seen in our cohort was the Rhino-orbito-cerebral (ROCM) one. COVID-19  
520 induced immune dysregulation, uncontrolled diabetes mellitus and indiscriminate use of steroids  
521 may be the risk factors associated with the sudden surge in Mucormycosis cases in India during  
522 the second wave. Clinicians should have a high index of suspicion for ROCM in patients  
523 recovering from COVID-19, especially among patients with new or previously diagnosed  
524 diabetes mellitus and clinical manifestations of headache, facial or orbital pain. Combination of  
525 surgical debridement and intravenous Amphotericin B therapy leads to clinical and radiologic  
526 improvement in majority of cases. Cerebral involvement by Mucor is associated with higher  
527 mortality.

### 528 **Acknowledgements:**

529 Manisha Ghate MD, PhD (National AIDS Research Institute (NARI), Pune, India) - edited the  
530 manuscript.

### 531 **References:**

532 1) Wu Z., McGoogan J.M. Characteristics of and important lessons from the coronavirus  
533 disease 2019 (COVID-19) outbreak in China: summary of a report of 72 314 cases from  
534 the Chinese Center for Disease Control and Prevention. *JAMA*. 2020.  
535 <https://doi.org/10.1001/jama.2020.2648>

536 2) World health organization (WHO): Available at  
537 [https://www.who.int/emergencies/diseases/novel-coronavirus-2019/technical-](https://www.who.int/emergencies/diseases/novel-coronavirus-2019/technical-guidance/naming-the-coronavirus-disease-(covid-2019)-and-the-virus-that-causes-it)  
538 [guidance/naming-the-coronavirus-disease-\(covid-2019\)-and-the-virus-that-causes-it](https://www.who.int/emergencies/diseases/novel-coronavirus-2019/technical-guidance/naming-the-coronavirus-disease-(covid-2019)-and-the-virus-that-causes-it).

539 3) World health organization (WHO) Coronavirus disease (COVID-19) dashboard.  
540 Available at: <https://covid19.who.int>.

541 4) Rawson TM, Moore LSP, Zhu N, Ranganathan N, Skolimowska K, Gilchrist M et al.  
542 Bacterial and Fungal Coinfection in Individuals With Coronavirus: A Rapid Review To  
543 Support COVID-19 Antimicrobial Prescribing. *Clin Infect Dis*. 2020 Dec 3; 71(9):2459-  
544 2468. doi: 10.1093/cid/ciaa530. PMID: 32358954; PMCID: PMC7197596.

545 5) Song G, Liang G, Liu W. Fungal Co-infections Associated with Global COVID-19  
546 Pandemic: A Clinical and Diagnostic Perspective from China. *Mycopathologia*. 2020  
547 Aug; 185(4):599-606. doi: 10.1007/s11046-020-00462-9. Epub 2020 Jul 31. PMID:  
548 32737747; PMCID: PMC7394275.

549 6) Press release from Government of India at  
550 <https://pib.gov.in/PressReleasePage.aspx?PRID=1728153> accessed July 21<sup>st</sup>, 2021.

551 7) Patel A, Agarwal R, Rudramurthy SM, Shevkani M, Xess I, Sharma R et al; MucoCovi  
552 Network3. Multicenter Epidemiologic Study of Coronavirus Disease-Associated  
553 Mucormycosis, India. *Emerg Infect Dis*. 2021 Jun 4; 27 (9). doi:  
554 10.3201/eid2709.210934. Epub ahead of print. PMID: 34087089.

555 8) Chakrabarti A, Kaur H, Savio J, Rudramurthy SM, Patel A, Shastri P et al. Epidemiology  
556 and clinical outcomes of invasive mould infections in Indian intensive care units (FISF

- 557 study). *J Crit Care*. 2019 Jun;51 :64-70. doi: 10.1016/j.jcrc.2019.02.005. Epub 2019 Feb  
558 5. PMID: 30769292.
- 559 9) Prakash H, Chakrabarti A. Global Epidemiology of Mucormycosis. *J Fungi (Basel)*. 2019  
560 Mar 21; 5(1):26.
- 561 10) Narayanan S, Chua JV, Baddley JW. COVID-19 associated Mucormycosis (CAM): risk  
562 factors and mechanisms of disease. *Clin Infect Dis*. 2021 Aug 22:ciab726. doi:  
563 10.1093/cid/ciab726. Epub ahead of print. PMID: 34420052.
- 564 11) García LF. Immune Response, Inflammation, and the Clinical Spectrum of COVID-19.  
565 *Front Immunol*. 2020 Jun 16; 11: 1441. <https://doi.org/10.3389/fimmu.2020.01441>
- 566 12) Catanzaro M, Fagiani F, Racchi M, Corsini E, Govoni S, Lanni C. Immune response in  
567 COVID-19: addressing a pharmacological challenge by targeting pathways triggered by  
568 SARS-CoV-2. *Signal Transduct Target Ther*. 2020 May 29; 5(1):84.  
569 <https://doi.org/10.1038/s41392-020-0191-1>
- 570 13) IDF Diabetes ATLAS Ninth Edition. 2019. [https://diabetesatlas.org/upload/resources/  
571 material/20200302\\_133351\\_IDFAT\\_LAS9e\\_final\\_web.pdf#page=42&zoom=auto](https://diabetesatlas.org/upload/resources/material/20200302_133351_IDFAT_LAS9e_final_web.pdf#page=42&zoom=auto).  
572 Accessed May 12, 2020.
- 573 14) Anjana RM, Deepa M, Pradeepa R, et al. Prevalence of diabetes and prediabetes in 15  
574 states : results from the ICMR–INDIAB population-based cross-sectional study. *Lancet  
575 Diabetes Endocrinol*.2017;5: 585-596.
- 576 15) Müller JA, Groß R, Conzelmann C, et al. SARS-CoV- 2 infects and replicates in cells of  
577 the human endocrine and exocrine pancreas. *Nat Metab*. 2021; 3: 149-165.  
578 <https://doi.org/10.1038/s42255-021-00347-1>.
- 579 16) WHO Rapid Evidence Appraisal for COVID-19 Therapies (REACT) Working Group,  
580 Sterne JAC, Murthy S, Diaz JV, Slutsky AS, Villar J, Angus DC et al. Association  
581 Between Administration of Systemic Corticosteroids and Mortality Among Critically Ill  
582 Patients With COVID-19: A Meta-analysis. *JAMA*. 2020 Oct 6; 324(13):1330-1341.  
583 <https://doi.org/10.1001/jama.2020.17023>
- 584 17) RECOVERY Collaborative Group, Horby P, Lim WS, Emberson JR, Mafham M, Bell  
585 JL, Linsell L et al. Dexamethasone in Hospitalized Patients with Covid-19 - Preliminary

- 586 Report. *N Engl J Med.* 2020 Jul 17: NEJMoa2021436.  
587 <https://doi.org/10.1056/NEJMoa2021436>
- 588 18) Lionakis MS, Kontoyiannis DP. Glucocorticoids and invasive fungal infections. *Lancet.*  
589 2003 Nov 29;362(9398):1828-38. doi: 10.1016/S0140-6736(03)14904-5. PMID:  
590 14654323.
- 591 19) Rodriguez-Morales AJ, Sah R, Millan-Oñate J, Gonzalez A, Montenegro-Idrogo JJ,  
592 Scherger S et al. COVID-19 associated mucormycosis: the urgent need to reconsider the  
593 indiscriminate use of immunosuppressive drugs. *Ther Adv Infect Dis.* 2021 Jun 18;8:  
594 20499361211027065. doi: 10.1177/20499361211027065. PMID: 34211710; PMCID:  
595 PMC8216396.
- 596 20) Actemra (tocilizumab) Prescribing information. South San Francisco, CA: Genentech,  
597 Inc; 2019.
- 598 21) Ibrahim AS, Spellberg B, Edwards J. Iron acquisition: a novel perspective on  
599 mucormycosis pathogenesis and treatment. *Curr Opin Infect Dis.* 2008; 21: 620-625.  
600 <https://doi.org/10.1097/QCO.0b013e3283165fd1>
- 601 22) Perricone C, Bartoloni E, Bursi R, et al. COVID-19 as part of the hyperferritinemic  
602 syndromes: the role of iron depletion therapy. *Immunol Res.* 2020; 68 : 213-224.  
603 <https://doi.org/10.1007/s12026-020-09145-5>.
- 604 23) Pasero D, Sanna S, Liperi C, Piredda D, Branca GP, Casadio L, Simeo R, Buselli A,  
605 Rizzo D, Bussu F, Rubino S, Terragni P. A challenging complication following SARS-  
606 CoV-2 infection: a case of pulmonary mucormycosis. *Infection.* 2020 Dec 17:1–6. doi:  
607 10.1007/s15010-020-01561-x. Epub ahead of print. PMID: 33331988; PMCID:  
608 PMC7745708.
- 609 24) Monte Junior ESD, Santos M, Ribeiro IB, et al. Rare and fatal gastrointestinal  
610 mucormycosis (Zygomycosis) in a COVID-19 patient: a case report. *Clin Endosc* 2020;  
611 53: 746–749.
- 612 25) Deutsch P.G., Whittaker J., Prasad S. Invasive and non-invasive fungal rhinosinusitis—a  
613 review and update of the evidence. *Medicina.* 2019;55: 1–14.

- 614 26) Brunet K and Rammaert B. Mucormycosis treatment: recommendations, latest advances,  
615 and perspectives. *J Mycol Med* 2020; 30: 101007.
- 616 27) Garg D, Muthu V, Sehgal IS, Ramachandran R, Kaur H, Bhalla A, Puri GD, Chakrabarti  
617 A, Agarwal R. Coronavirus Disease (Covid-19) Associated Mucormycosis (CAM): Case  
618 Report and Systematic Review of Literature. *Mycopathologia*. 2021 May;186(2):289-  
619 298. doi: 10.1007/s11046-021-00528-2. Epub 2021 Feb 5. PMID: 33544266; PMCID:  
620 PMC7862973.
- 621 28) Baskar HC, Chandran A, Reddy CS, Singh S. Rhino-orbital mucormycosis in a COVID-  
622 19 patient. *BMJ Case Rep*. 2021 Jun 24;14(6):e244232. doi: 10.1136/bcr-2021-244232.  
623 PMID: 34167998; PMCID: PMC8230977.
- 624 29) Rao R, Shetty AP, Nagesh CP. Orbital infarction syndrome secondary to rhino-orbital  
625 mucormycosis in a case of COVID-19: Clinico-radiological features. *Indian J*  
626 *Ophthalmol*. 2021 Jun;69(6):1627-1630. doi: 10.4103/ijo.IJO\_1053\_21. PMID:  
627 34011758.
- 628 30) Werthman-Ehrenreich A. Mucormycosis with orbital compartment syndrome in a  
629 patient with COVID-19. *Am J Emerg Med* 2021; 42: 264. e5–264.e8.
- 630 31) Placik DA, Taylor WL and Wnuk NM. Bronchopleural fistula development in the  
631 setting of novel therapies for acute respiratory distress syndrome in SARS-CoV-2  
632 pneumonia. *Radiol Case Rep* 2020; 15: 2378–2381.
- 633 32) Kanwar A, Jordan A, Olewiler S, et al. A fatal case of *Rhizopus azygosporus* pneumonia  
634 following COVID-19. *J Fungi (Basel)* 2021; 7: 174.
- 635 33) Dallalzadeh LO, Ozzello DJ, Liu CY, et al. Secondary infection with rhino-orbital  
636 cerebral mucormycosis associated with COVID-19. *Orbit*. Epub ahead of print 23 March  
637 2021. DOI: 10.1080/01676830.2021.1903044.
- 638 34) Johnson AK, Ghazarian Z, Cendrowski KD, et al. Pulmonary aspergillosis and  
639 mucormycosis in a patient with COVID-19. *Med Mycol Case Rep* 2021; 32: 64–67.
- 640 35) Zurl C, Hoenigl M, Schulz E, et al. Autopsy proven pulmonary mucormycosis due to  
641 *Rhizopus microsporus* in a critically ill COVID-19 patient with underlying  
642 hematological malignancy. *J Fungi (Basel)* 2021; 7: 88.

- 643 36) Khatri A, Chang KM, Berlinrut I, et al. Mucormycosis after coronavirus disease 2019  
644 infection in a heart transplant recipient – case report and review of literature. *J Mycol*  
645 *Med* 2021; 31: 101125.
- 646 37) Waizel-Haiat S, Guerrero-Paz JA, Sanchez-Hurtado L, Calleja-Alarcon S, Romero-  
647 Gutierrez L. A Case of Fatal Rhino-Orbital Mucormycosis Associated With New Onset  
648 Diabetic Ketoacidosis and COVID-19. *Cureus*. 2021 Feb 5;13(2):e13163. doi:  
649 10.7759/cureus.13163. PMID: 33575155; PMCID: PMC7870113.
- 650 38) Bellanger AP, Navellou JC, Lepiller Q, et al. Mixed mold infection with *Aspergillus*  
651 *fumigatus* and *Rhizopus microsporus* in a severe acute respiratory syndrome  
652 Coronavirus 2 (SARSCoV-2) patient. *Infect Dis Now*. Epub ahead of print 27 January  
653 2021. DOI: 10.1016/j. idnow.2021.01.010.
- 654 39) Ahmadikia K, Hashemi SJ, Khodavaisy S, et al. The double-edged sword of systemic  
655 corticosteroid therapy in viral pneumonia: a case report and comparative review of  
656 influenza associated mucormycosis versus COVID-19 associated mucormycosis.  
657 *Mycoses*. Epub ahead of print 16 February 2021. DOI: 10.1111/ myc.13256.
- 658 40) Karimi-Galougahi M, Arastou S and Haseli S. Fulminant mucormycosis complicating  
659 coronavirus disease 2019 (COVID-19). *Int Forum Allergy Rhinol*. Epub ahead of print  
660 13 March 2021. DOI: 10.1002/alr.22785.
- 661 41) Veisi A, Bagheri A, Eshaghi M, et al. Rhinorbital mucormycosis during steroid therapy  
662 in COVID-19 patients: a case report. *Eur J Ophthalmol*. Epub ahead of print 10 April  
663 2021. DOI: 10.1177/11206721211009450.
- 664 42) Meshram HS, Kute VB, Chauhan S, Desai S. Mucormycosis in post-COVID-19 renal  
665 transplant patients: A lethal complication in follow-up. *Transpl Infect Dis*. 2021. June  
666 3:e13663. <https://doi.org/10.1111/tid.13663> 10.1111/tid.13663 PMid: ;PMCID: . - DOI-  
667 PMC - PubMed
- 668 43) Mehta S and Pandey A. Rhino-orbital mucormycosis associated with COVID-19.  
669 *Cureus* 2020; 12: e10726.
- 670 44) Sen M, Lahane S, Lahane TP, et al. *Mucor* in a viral land: a tale of two pathogens.  
671 *Indian J Ophthalmol* 2021; 69: 244–252.

- 672 45) Sarkar S, Gokhale T, Choudhury SS, et al. COVID-19 and orbital mucormycosis. *Indian*  
673 *J Ophthalmol* 2021; 69: 1002–1004.
- 674 46) Sharma S, Grover M, Bhargava S, Samdani S, Kataria T. Post coronavirus disease  
675 mucormycosis: a deadly addition to the pandemic spectrum. *J Laryngol Otol*. Epub  
676 ahead of print 8 April 2021. DOI: 10.1017/S0022215121000992.
- 677 47) Saldanha M, Reddy R, Vincent MJ. Paranasal mucormycosis in COVID-19 patient.  
678 *Indian J Otolaryngol Head Neck Surg*. Epub ahead of print 22 April 2021. doi:  
679 10.1007/s12070-021-02574-0.
- 680 48) Revannavar SM, Supriya PS, Samaga L, et al. COVID-19 triggering mucormycosis in a  
681 susceptible patient: a new phenomenon in the developing world? *BMJ Case Rep* 2021;  
682 14: e241663.
- 683 49) Maini A, Tomar G, Khanna D, et al. Sino-orbital mucormycosis in a COVID-19 patient:  
684 a case report. *Int J Surg Case Rep* 2021; 82: 105957.
- 685 50) Krishna V, Morjaria J, Jalandari R, Omar F, Kaul S. Autoptic identification of  
686 disseminated mucormycosis in a young male presenting with cerebrovascular event,  
687 multi-organ dysfunction and COVID-19 infection. *IDCases*. 2021;25:e01172. doi:  
688 10.1016/j.idcr.2021.e01172. Epub 2021 May 28. PMID: 34075329; PMCID:  
689 PMC8161734.
- 690 51) Ravani SA, Agrawal GA, Leuva PA, et al. Rise of the phoenix: mucormycosis in  
691 COVID-19 times. *Indian J Ophthalmol* 2021; 69: 1563–1568
- 692 52) Selarka L, Sharma S, Saini D, Sharma S, Batra A, Waghmare VT et al. Mucormycosis  
693 and COVID-19: An epidemic within a pandemic in India. *Mycoses*. 2021 Jul 13. doi:  
694 10.1111/myc.13353. Epub ahead of print. PMID: 34255907.
- 695 53) Moorthy A, Gaikwad R, Krishna S, et al. SARS-CoV-2, Uncontrolled diabetes and  
696 corticosteroids-an unholy trinity in invasive fungal infections of the maxillofacial  
697 region? A retrospective, multi-centric analysis. *J Maxillofac Oral Surg*. Epub ahead of  
698 print 6 March 2021. DOI: 10.1007/s12663-021-01532-1.
- 699 54) Pakdel F, Ahmadikia K, Salehi M, Tabari A, Jafari R, Mehrparvar G, Rezaie Y, Rajaeih  
700 S, Alijani N, Barac A, Abdollahi A, Khodavaisy S. Mucormycosis in patients with  
701 COVID-19: A cross-sectional descriptive multicentre study from Iran. *Mycoses*. 2021



- 702 Jun 7:10.1111/myc.13334. doi: 10.1111/myc.13334. Epub ahead of print. PMID:  
703 34096653; PMCID: PMC8242414.
- 704 55) Sen M, Honavar SG, Bansal R, Sengupta S, Rao R, Kim U, et al. Epidemiology, clinical  
705 profile, management, and outcome of COVID-19-associated rhino-orbital-cerebral  
706 mucormycosis in 2826 patients in India - Collaborative OPAI-IJO Study on  
707 Mucormycosis in COVID-19 (COSMIC), Report 1. *Indian J Ophthalmol.* 2021;69  
708 (7):1670-1692. doi:10.4103/ijo.IJO\_1565\_21.
- 709 56) Ramaswami A, Sahu AK, Kumar A, Suresh S, Nair A, Gupta D et al. COVID-19  
710 associated Mucormycosis Presenting to the Emergency Department - An Observational  
711 Study of 70 Patients. *QJM.* 2021 Jul 12: hcab190. doi: 10.1093/qjmed/hcab190. Epub  
712 ahead of print. PMID: 34254132.
- 713 57) Pal R, Singh B, Bhadada SK, Banerjee M, Bhogal RS, Hage N et al. COVID-19-  
714 associated mucormycosis: An updated systematic review of literature. *Mycoses.* 2021  
715 Jun 16. doi: 10.1111/myc.13338. Epub ahead of print. PMID: 34133798.
- 716 58) Singh AK, Singh R, Joshi SR, Misra A. Mucormycosis in COVID-19: A systematic  
717 review of cases reported worldwide and in India. *Diabetes Metab Syndr.* 2021 May  
718 21;15 (4):102146. doi: 10.1016/j.dsx.2021.05.019. Epub ahead of print. PMID:  
719 34192610; PMCID: PMC8137376.
- 720 59) Mishra Y, Prashar M, Sharma D, Akash Kumar VP, Tilak TVSVGK. Diabetes, COVID  
721 19 and mucormycosis: Clinical spectrum and outcome in a tertiary care medical center  
722 in Western India. *Diabetes Metab Syndr.* 2021 Jul 3;15 (4):102196. doi:  
723 10.1016/j.dsx.2021.102196. Epub ahead of print. PMID: 34246939; PMCID:  
724 PMC8253699.
- 725 60) Kumari A, Rao NP, Patnaik U, Malik V, Tevatia MS, Thakur S et al. Management  
726 outcomes of mucormycosis in COVID-19 patients: A preliminary report from a tertiary  
727 care hospital. *Med J Armed Forces India.* 2021 Jul;77: S289-S295. doi:  
728 10.1016/j.mjafi.2021.06.009. Epub 2021 Jul 26. PMID: 34334896; PMCID:  
729 PMC8313063.
- 730 61) Dubey S, Mukherjee D, Sarkar P, Mukhopadhyay P, Barman D, Bandopadhyay M et al.  
731 COVID-19 associated rhino-orbital-cerebral mucormycosis: An observational study

- 732 from Eastern India, with special emphasis on neurological spectrum. *Diabetes Metab*  
733 *Syndr.* 2021 Sep 1:102267. doi: 10.1016/j.dsx.2021.102267. Epub ahead of print.  
734 PMID: PMC8407938.
- 735 62) CLINICAL MANAGEMENT PROTOCOL: COVID-19. Government of India Ministry  
736 of Health and Family Welfare Directorate General of Health Services (EMR Division).  
737 Version 5. Published May 2021. Available at:  
738 [https://www.mohfw.gov.in/pdf/UpdatedClinicalManagementProtocolforCOVID19dated0](https://www.mohfw.gov.in/pdf/UpdatedClinicalManagementProtocolforCOVID19dated03072020.pdf)  
739 [3072020.pdf](https://www.mohfw.gov.in/pdf/UpdatedClinicalManagementProtocolforCOVID19dated03072020.pdf).
- 740 63) Guideline for management of Mucormycosis in Covid – 19 patients. Government of  
741 India Ministry of Health and Family Welfare Directorate General of Health Services  
742 (EMR Division). Available at:  
743 [https://dghs.gov.in/WriteReadData/News/202105171119301555988Mucormycosismana](https://dghs.gov.in/WriteReadData/News/202105171119301555988MucormycosismanagementinCovid-19.pdf)  
744 [gementinCovid-19.pdf](https://dghs.gov.in/WriteReadData/News/202105171119301555988MucormycosismanagementinCovid-19.pdf)
- 745 64) Cornely OA, Alastruey-Izquierdo A, Arenz D, et al. Global guideline for the diagnosis  
746 and management of mucormycosis: an initiative of the European Confederation of  
747 Medical Mycology in cooperation with the Mycoses Study Group Education and  
748 Research Consortium. *Lancet Infect Dis* 2019; 19: e405–e421.
- 749 65) Shah K, Dave V, Bradoo R, Shinde C, Prathibha M. Orbital Exenteration in Rhino-  
750 Orbito-Cerebral Mucormycosis: A Prospective Analytical Study with Scoring  
751 System. *Indian J Otolaryngol Head Neck Surg.* 2019; 71 (2):259-265.  
752 doi:10.1007/s12070-018-1293-8.
- 753 66) Francone M, Iafrate F, Masci GM, Coco S, Cilia F, Manganaro Let al. Chest CT score in  
754 COVID-19 patients: correlation with disease severity and short-term prognosis. *Eur*  
755 *Radiol.* 2020 Dec; 30(12): 6808-6817. <https://doi.org/10.1007/s00330-020-07033-y>.
- 756 67) AIIMS/ICMR-COVID-19 National Task force/Joint monitoring group (Dte GHS).  
757 Ministry of health and family welfare, Government of India. Clinical guidance for  
758 management of adult COVID-19 patients. Published 17<sup>th</sup> May 2021. Available at:  
759 <https://covid.aiims.edu/clinical-guidance-for-management-of-adult-covid-19-patients/>
- 760 68) Roden MM, Zaoutis TE, Buchanan WL, Knudsen TA, Sarkisova TA, Schaufele RLet al.  
761 Epidemiology and outcome of zygomycosis: a review of 929 reported cases. *Clin Infect*

762 Dis. 2005 Sep 1; 41(5):634-53. doi: 10.1086/432579. Epub 2005 Jul 29. PMID:  
763 16080086.

764 69) World health organization (WHO): COVID-19 Clinical management: living guidance.  
765 Accessed 1<sup>st</sup> September 2021. Available at:  
766 <https://www.who.int/publications/i/item/WHO-2019-nCoV-clinical-2021-1>

767  
768  
769  
770  
771  
772  
773  
774  
775  
776  
777  
778  
779  
780  
781  
782  
783  
784  
785  
786  
787  
788  
789  
790  
791  
792  
793  
794  
795  
796  
797  
798  
799  
800  
801  
802  
803  
804  
805  
806  
807  
808  
809

810 **Table 1: Epidemiology of COVID-19 admission in Mucormycosis patients**

| <b>Baseline characteristics</b>        | <b>Total<br/>(N=59)<br/>n (%)</b> | <b>Discharged<br/>(n=44)<br/>n (%)</b> | <b>Death<br/>(n=15)<br/>n (%)</b> | <b>p-value</b> |
|----------------------------------------|-----------------------------------|----------------------------------------|-----------------------------------|----------------|
| <b>Age (Years)</b>                     |                                   |                                        |                                   | 0.077          |
| ≤ 60 years                             | 42 (71.2)                         | 34 (77.3)                              | 8 (53.3)                          |                |
| > 60 years                             | 17 (28.8)                         | 10 (22.7)                              | 7 (46.7)                          |                |
| Median (IQR)                           | 52 (41, 61)                       | 50 (40, 58)                            | 57 (42, 65)                       | 0.136          |
| <b>Gender</b>                          |                                   |                                        |                                   | 0.481          |
| Male                                   | 47 (79.7)                         | 36 (81.8)                              | 11 (73.3)                         |                |
| Female                                 | 12 (20.3)                         | 8 (18.2)                               | 4 (26.7)                          |                |
| <b>Co-morbidities</b>                  |                                   |                                        |                                   |                |
| <b>Diabetes Mellitus</b>               |                                   |                                        |                                   | 0.216          |
| Non-diabetic                           | 6 (10.2)                          | 5 (11.4)                               | 1 (6.7)                           |                |
| Known Diabetes Mellitus                | 36 (61.0)                         | 24 (54.5)                              | 12 (80.0)                         |                |
| Newly diagnosed DM/ IFG                | 17 (28.8)                         | 15 (34.1)                              | 2 (13.3)                          |                |
| <b>Hypertension</b>                    | 24 (40.7)                         | 17 (38.6)                              | 7 (46.7)                          | 0.585          |
| <b>Chronic kidney disease</b>          | 9 (15.3)                          | 6 (13.6)                               | 3 (20.0)                          | 0.680          |
| <b>Ischemic Heart Disease</b>          | 7 (11.9)                          | 4 (9.1)                                | 3 (20.0)                          | 0.355          |
| <b>Chronic liver disease</b>           | 2 (3.4)                           | 0 (0.0)                                | 2 (13.3)                          | 0.061          |
| <b>Stroke</b>                          | 1 (1.7)                           | 0 (0.0)                                | 1 (6.7)                           | 0.254          |
| <b>HIV/ Hepatitis B infection</b>      | 1 (1.7)                           | 1 (2.3)                                | 0 (0.0)                           | >0.999         |
| <b>Obesity</b>                         | 2 (3.4)                           | 1 (2.3)                                | 1 (6.7)                           | 0.447          |
| <b>Hypo/hyperthyroidism</b>            | 3 (5.1)                           | 2 (4.5)                                | 1 (6.7)                           | >0.999         |
| <b>Severity of COVID-19</b>            |                                   |                                        |                                   | 0.223          |
| Mild                                   | 16 (27.1)                         | 12 (27.3)                              | 4 (26.7)                          |                |
| Moderate                               | 29 (49.2)                         | 24 (54.5)                              | 5 (33.3)                          |                |
| Severe                                 | 14 (23.7)                         | 8 (18.2)                               | 6 (40.0)                          |                |
| <b>HRCT chest COVID severity score</b> |                                   |                                        |                                   | <b>0.047</b>   |
| < 18                                   | 55 (93.2)                         | 43 (97.7)                              | 12 (80.0)                         |                |
| ≥ 18                                   | 4 (6.8)                           | 1 (2.3)                                | 3 (20.0)                          |                |
| <b>Median (IQR)</b>                    | <b>12 (8, 15)</b>                 | <b>12 (8, 14)</b>                      | <b>14 (8, 17)</b>                 | <b>0.152</b>   |
| <b>COVID-19 admission Median(IQR)</b>  |                                   |                                        |                                   |                |
| Duration of hospitalization (days)     | 9 (6, 14)                         | 8 (6, 13.5)                            | 10 (7, 15)                        | 0.149          |
| Duration of ICU stay (days)            | 0 (0, 10)                         | 0 (0, 0)                               | 0 (0, 10)                         | 0.303          |
| Duration of ventilation (days)         | 0 (0, 10)                         | 0 (0, 0)                               | 0 (0, 10)                         | <b>0.046</b>   |
| <b>COVID-19 vaccine status</b>         |                                   |                                        |                                   | 0.826          |
| No vaccination                         | 46 (78.0)                         | 34 (77.3)                              | 12 (80.0)                         |                |
| AstraZeneca - 1 dose                   | 9 (15.3)                          | 7 (15.9)                               | 2 (13.3)                          |                |
| AstraZeneca - 2 doses                  | 2 (3.4)                           | 1 (2.3)                                | 1 (6.7)                           |                |
| Covaxin (Bharat Biotech) - 1 dose      | 1 (1.7)                           | 1 (2.3)                                | 0 (0.0)                           |                |
| Covaxin (Bharat Biotech)- 2 dose       | 1 (1.7)                           | 1 (2.3)                                | 0 (0.0)                           |                |

811

812 DM- Diabetes mellitus; IFG- Impaired fasting glucose; HRCT- High resolution computerized  
813 tomography; HIV- Human immunodeficiency virus

814

815

816 **Table 2a: Drugs administered during COVID-19 treatment**

| Concomitant drugs              | Total<br>(N=59)<br>n (%) | Discharged<br>(n=44)<br>n (%) | Death<br>(n=15)<br>n (%) | p-value      |
|--------------------------------|--------------------------|-------------------------------|--------------------------|--------------|
| Meropenem                      | 18 (30.5)                | 13 (29.5)                     | 5 (33.3)                 | 0.783        |
| Teicoplanin                    | 12 (20.3)                | 7 (15.9)                      | 5 (33.3)                 | 0.148        |
| Clindamycin                    | 0 (0.0)                  | 0 (0.0)                       | 0 (0.0)                  |              |
| Doxycycline                    | 25 (42.4)                | 19 (43.2)                     | 6 (40.0)                 | 0.829        |
| Ivermectin                     | 16 (27.1)                | 13 (29.5)                     | 3 (20.0)                 | 0.473        |
| Piperacillin-Tazobactam        | 34 (57.6)                | 24 (54.5)                     | 10 (66.7)                | 0.412        |
| Polymyxin                      | 2 (3.4)                  | 0 (0.0)                       | 2 (13.3)                 | 0.061        |
| Fluconazole                    | 12 (20.3)                | 7 (15.9)                      | 5 (33.3)                 | 0.148        |
| Caspofungin                    | 2 (3.4)                  | 0 (0.0)                       | 2 (13.3)                 | 0.061        |
| Favipravir                     | 35 (59.3)                | 25 (56.8)                     | 10 (66.7)                | 0.503        |
| Remdesivir                     | 40 (67.8)                | 29 (65.9)                     | 11 (73.3)                | 0.595        |
| Hydroxychloroquine (HCQ)       | 0 (0.0)                  | 0 (0.0)                       | 0 (0.0)                  |              |
| Azithromycin                   | 4 (6.8)                  | 4 (9.1)                       | 0 (0.0)                  | 0.564        |
| Lopinavir/ritonavir            | 0 (0.0)                  | 0 (0.0)                       | 0 (0.0)                  |              |
| Famotidine                     | 0 (0.0)                  | 0 (0.0)                       | 0 (0.0)                  |              |
| Enoxaparin                     | 52 (88.1)                | 37 (84.1)                     | 15 (100)                 | 0.174        |
| <b>Immunomodulator therapy</b> |                          |                               |                          |              |
| Not given                      | 46 (78)                  | 36 (81.8)                     | 10 (66.7)                |              |
| Itolizumab                     | 1 (1.7)                  | 1 (2.3)                       | 0 (0.0)                  |              |
| Baricitinib                    | 2 (3.4)                  | 2 (4.5)                       | 0 (0.0)                  |              |
| Bevacizumab                    | 2 (3.4)                  | 2 (4.5)                       | 0 (0.0)                  |              |
| Bevacizumab+Infliximab         | 1 (1.7)                  | 1 (2.3)                       | 0 (0.0)                  |              |
| Idofinib                       | 1 (1.7)                  | 1 (2.3)                       | 0 (0.0)                  |              |
| Infliximab                     | 1 (1.7)                  | 0 (0.0)                       | 1 (6.7)                  |              |
| Tocilizumab                    | 5 (8.5)                  | 1 (2.3)                       | 4 (26.7)                 |              |
| Convalescent Plasma            | 4 (6.8)                  | 3 (6.8)                       | 1 (6.7)                  | >0.999       |
| Pirfenidone                    | 12 (20.3)                | 6 (13.6)                      | 6 (40.0)                 | <b>0.028</b> |
| Nintedanib                     | 10 (16.9)                | 5 (11.4)                      | 5 (33.3)                 | <b>0.050</b> |
| Dialysis                       | 1 (1.7)                  | 0 (0.0)                       | 1 (6.7)                  | 0.254        |
| Noradrenaline                  | 3 (5.1)                  | 0 (0.0)                       | 3 (20.0)                 | <b>0.014</b> |
| Vasopressin                    | 1 (1.7)                  | 0 (0.0)                       | 1 (6.7)                  | 0.254        |

817

818

819 **Table 2b: Steroids and Supplemental Oxygen used during COVID-19 treatment**

| Steroids/Oxygen use in<br>COVID-19 treatment     | Total<br>(N=59)<br>n (%) | Discharged<br>(n=44)<br>n (%) | Death<br>(n=15)<br>n (%) | p-value      |
|--------------------------------------------------|--------------------------|-------------------------------|--------------------------|--------------|
| <b>Steroids given for treating COVID-19</b>      |                          |                               |                          |              |
| Methylprednisolone                               | 54 (91.5)                | 40 (90.9)                     | 14 (93.3)                | >0.999       |
| Dexamethasone                                    | 4 (6.8)                  | 4 (9.1)                       | 0 (0.0)                  | 0.564        |
| Oral Prednisolone                                | 10 (16.9)                | 8 (18.2)                      | 2 (13.3)                 | >0.999       |
| Oral Deflazacort                                 | 1 (1.7)                  | 1 (2.3)                       | 0 (0.0)                  | >0.999       |
| <b>Oxygen given during treatment of COVID-19</b> |                          |                               |                          |              |
| Nasal oxygen by prongs                           | 5 (8.5)                  | 5 (11.4)                      | 0 (0.0)                  | 0.315        |
| Nasal oxygen by face mask                        | 1 (1.7)                  | 0 (0.0)                       | 1 (6.7)                  | 0.254        |
| Nasal oxygen by NRBM                             | 28 (47.5)                | 21 (47.7)                     | 7 (46.7)                 | 0.943        |
| NRBM (days) Median (IQR)                         | 7 (4, 10)                | 5 (4, 10)                     | 7 (7, 10)                | 0.369        |
| HFNO                                             | 2 (3.4)                  | 1 (2.3)                       | 1 (6.7)                  | 0.447        |
| HFNO (days) Median (IQR)                         | 14 (10, 17)              | 17 (17, 17)                   | 10 (10, 10)              | 0.317        |
| NIV                                              | 7 (11.9)                 | 3 (6.8)                       | 4 (26.7)                 | 0.062        |
| NIV (days) Median (IQR)                          | 8 (3, 15)                | 3 (3, 15)                     | 9 (5, 14)                | 0.721        |
| Invasive mechanical ventilation (IMV)            | 3 (5.1)                  | 0 (0.0)                       | 3 (20.0)                 | <b>0.014</b> |
| IMV (days) Median (IQR)                          | 2 (1, 4)                 | 0 (0, 0)                      | 2 (1, 4)                 |              |

820 NRBM- Non re-breathing mask; IQR- Inter-quartile range; HFNO-High flow nasal oxygen; NIV- Non-  
821 invasive ventilation; IMV- Invasive mechanical ventilation

822

823

824

825

826

827

828

829

830

831

832

833

834

835 **Table 3: Baseline characteristics of patients of Mucormycosis**

| <b>Mucormycosis</b>                                                               | <b>Total<br/>n (%)</b> | <b>Discharged<br/>n (%)</b> | <b>Death<br/>n (%)</b> | <b>p-value</b>    |
|-----------------------------------------------------------------------------------|------------------------|-----------------------------|------------------------|-------------------|
| <b>Total patients</b>                                                             | <b>59</b>              | <b>44 (74.6)</b>            | <b>15 (25.4)</b>       | <b>0.0002</b>     |
| <b>Type of Mucormycosis</b>                                                       |                        |                             |                        | <b>&lt;0.0001</b> |
| Rhinal involvement only                                                           | 24 (40.7)              | 24 (54.5)                   | 0 (0.0)                |                   |
| Rhinal + Orbital involvement                                                      | 8 (13.6)               | 7 (15.9)                    | 1 (6.7)                |                   |
| Rhinal + Orbital + Cerebral                                                       | 25 (42.4)              | 13 (29.5)                   | 12 (80.0)              |                   |
| Rhinal + Cerebral                                                                 | 1 (1.7)                | 0 (0.0)                     | 1 (6.7)                |                   |
| Renal                                                                             | 1 (1.7)                | 0 (0.0)                     | 1 (6.7)                |                   |
| <b>Symptoms of Mucormycosis</b>                                                   |                        |                             |                        |                   |
| Facial pain                                                                       | 42 (71.2)              | 32 (72.7)                   | 10 (66.7)              | 0.654             |
| Facial swelling                                                                   | 33 (55.9)              | 22 (50.0)                   | 11 (73.3)              | 0.142             |
| Headache                                                                          | 43 (72.9)              | 32 (72.7)                   | 11 (73.3)              | >0.999            |
| Eye swelling                                                                      | 33 (55.9)              | 20 (45.5)                   | 13 (86.7)              | <b>0.007</b>      |
| Eye pain                                                                          | 29 (49.2)              | 17 (38.6)                   | 12 (80.0)              | <b>0.007</b>      |
| Loss of vision                                                                    | 21 (35.6)              | 9 (20.5)                    | 12 (80.0)              | <b>&lt;0.0001</b> |
| Ptosis                                                                            | 21 (35.6)              | 11 (25.0)                   | 10 (66.7)              | <b>0.004</b>      |
| Deviation of angle of mouth                                                       | 5 (8.5)                | 3 (6.8)                     | 2 (13.3)               | 0.593             |
| Nasal discharge                                                                   | 15 (25.4)              | 13 (29.5)                   | 2 (13.3)               | 0.310             |
| Limb weakness                                                                     | 5 (8.5)                | 1 (2.3)                     | 4 (26.7)               | <b>0.013</b>      |
| Toothache                                                                         | 27 (45.8)              | 24 (54.5)                   | 3 (20.0)               | <b>0.034</b>      |
| <b>Duration of symptoms (days)</b>                                                |                        |                             |                        |                   |
| Median (IQR)                                                                      | 6 (3, 9)               | 6 (3, 10)                   | 5 (3, 8)               | 0.488             |
| <b>Duration between 1st positive COVID-19 test<br/>and Mucormycosis diagnosis</b> |                        |                             |                        | 0.751             |
| < 7 days                                                                          | 2 (3.4)                | 2 (4.5)                     | 0 (0.0)                |                   |
| 7-14 days                                                                         | 20 (33.9)              | 14 (31.8)                   | 6 (40.0)               |                   |
| 15-28 days                                                                        | 28 (47.5)              | 20 (45.5)                   | 8 (53.3)               |                   |
| > 28 days                                                                         | 9 (15.3)               | 8 (18.2)                    | 1 (6.7)                |                   |
| <b>Median (IQR)</b>                                                               | <b>17 (12, 22)</b>     | <b>17 (13, 23)</b>          | <b>17 (10, 21)</b>     | <b>0.676</b>      |

836 IQR- Interquartile range

837

838

839

840

841

842

843

844

845

846

847 **Table 4: Baseline investigations during admission for Mucormycosis**

| Baseline characteristics                                     | Total<br>(N=59)<br>n (%)           | Discharged<br>(n=44)<br>n (%)      | Death<br>(n=15)<br>n (%)           | p-value      |
|--------------------------------------------------------------|------------------------------------|------------------------------------|------------------------------------|--------------|
| <b>Laboratory investigations</b>                             |                                    |                                    |                                    |              |
| Hemoglobin (g/dL)                                            | 13.4<br>(11.4, 14.5)               | 13.75<br>(12.05, 14.5)             | 12.5<br>(10.9, 13.9)               | 0.169        |
| WBC (per microliter)                                         | 10400<br>(7000, 14400)             | 10150<br>(7000, 13500)             | 11900<br>(7000, 15400)             | 0.568        |
| Absolute Neutrophil count (ANC)                              | 8100<br>(5248, 11475)              | 7902<br>(5214, 11260)              | 9559<br>(5250, 13490)              | 0.447        |
| Platelet count                                               | 227000<br>(178000, 308000)         | 231000<br>(189000, 308500)         | 198000<br>(160000, 308000)         | 0.186        |
| Total Bilirubin (mg/dL)                                      | 1.035<br>(0.83, 1.36)              | 1.06<br>(0.85, 1.335)              | 0.905<br>(0.7, 1.41)               | 0.369        |
| Direct Bilirubin conjugated (mg/dL)                          | 0.315<br>(0.26, 0.46)              | 0.325<br>(0.26, 0.46)              | 0.295<br>(0.24, 0.6)               | 0.601        |
| SGOT (units/L)                                               | 31 (18, 50)                        | 28 (18, 40)                        | 45 (32, 53)                        | 0.054        |
| SGPT (units/L)                                               | 35 (23, 52)                        | 35 (22, 45)                        | 47.5 (33, 99)                      | 0.071        |
| Blood urea level (mg/dL)                                     | 32 (22, 54)                        | 28 (20.5, 49)                      | 41 (27, 92)                        | <b>0.030</b> |
| Serum Creatinine (mg/dL)                                     | 1.1 (0.96, 1.27)                   | 1.085 (0.96, 1.205)                | 1.12 (1.02, 1.61)                  | 0.261        |
| Potassium (mmol/L)                                           | 4 (3.5, 4.5)                       | 4 (3.5, 4.4)                       | 3.9 (3.2, 4.5)                     | 0.656        |
| <b>Absolute Lymphocyte count (ALC, cells/mm<sup>3</sup>)</b> |                                    |                                    |                                    |              |
| < 1000                                                       | 14 (24.6)                          | 8 (18.2)                           | 6 (46.2)                           |              |
| ≥ 1000                                                       | 43 (75.4)                          | 36 (81.8)                          | 7 (53.8)                           |              |
| <b>Median (IQR)</b>                                          | <b>1350<br/>(1010, 1750)</b>       | <b>1407.5<br/>(1185, 1996.5)</b>   | <b>1045<br/>(595, 1308)</b>        | <b>0.008</b> |
| <b>Procalcitonin (ng/mL)</b>                                 |                                    |                                    |                                    |              |
| < 0.05                                                       | 1 (2.5)                            | 0 (0)                              | 1 (9.1)                            |              |
| 0.05-2.0                                                     | 28 (70)                            | 22 (75.9)                          | 6 (54.5)                           |              |
| > 2.0                                                        | 11 (27.5)                          | 7 (24.1)                           | 4 (36.4)                           |              |
| <b>Median (IQR)</b>                                          | <b>0.38<br/>(0.2085, 2.735)</b>    | <b>0.392<br/>(0.207, 1.56)</b>     | <b>0.341<br/>(0.212, 3.81)</b>     | <b>0.797</b> |
| <b>C-reactive Protein (mg/L)</b>                             |                                    |                                    |                                    |              |
| 0-6                                                          | 2 (4.7)                            | 2 (6.3)                            | 0 (0)                              |              |
| 7-49                                                         | 9 (20.9)                           | 8 (25)                             | 1 (9.1)                            |              |
| ≥ 50                                                         | 32 (74.4)                          | 22 (68.8)                          | 10 (90.9)                          |              |
| <b>Median (IQR)</b>                                          | <b>84.7<br/>(41, 167)</b>          | <b>74.25<br/>(39, 138.75)</b>      | <b>173.735<br/>(64.3, 207.5)</b>   | <b>0.032</b> |
| <b>Ferritin (mcg/L)</b>                                      |                                    |                                    |                                    |              |
| 15-150                                                       | 3 (9.4)                            | 3 (12.5)                           | 0 (0)                              |              |
| 151-1000                                                     | 16 (50)                            | 13 (54.2)                          | 3 (37.5)                           |              |
| > 1000                                                       | 13 (40.6)                          | 8 (33.3)                           | 5 (62.5)                           |              |
| <b>Median (IQR)</b>                                          | <b>857.1<br/>(280.5, 1429)</b>     | <b>677.25<br/>(262.55, 1108)</b>   | <b>1346.5<br/>(720.55, 1817.5)</b> | <b>0.089</b> |
| <b>D-Dimer (mcg/mL)</b>                                      |                                    |                                    |                                    |              |
| < 252                                                        | 9 (24.3)                           | 7 (25.9)                           | 2 (20)                             |              |
| 253-1000                                                     | 17 (45.9)                          | 13 (48.1)                          | 4 (40)                             |              |
| > 1000                                                       | 11 (29.7)                          | 7 (25.9)                           | 4 (40)                             |              |
| <b>Median (IQR)</b>                                          | <b>483.5<br/>(253.73, 1201.00)</b> | <b>427.1<br/>(237.08, 1071.71)</b> | <b>566.9<br/>(255.48, 20)</b>      | <b>0.321</b> |



848 WBC- White blood cell; IQR- Interquartile range; SGPT- Serum glutamate pyruvate transaminase;  
849 SGOT- Serum glutamate oxaloacetate transaminase.

850 **Table 5: Treatment regimens used in Mucormycosis**

| Treatment regimen for Mucormycosis      | Total<br>(N=59)<br>n (%) | Discharged<br>(n=44)<br>n (%) | Death<br>(n=15)<br>n (%) | p-value           |
|-----------------------------------------|--------------------------|-------------------------------|--------------------------|-------------------|
| <b>Drugs administered</b>               |                          |                               |                          |                   |
| Liposomal Amphotericin B                | 53 (89.8)                | 42 (95.5)                     | 11 (73.3)                | <b>0.032</b>      |
| Amphotericin B lipid complex/emulsion   | 17 (28.8)                | 17 (38.6)                     | 0 (0.0)                  | <b>0.003</b>      |
| Amphotericin B de-oxycholate            | 27 (45.8)                | 22 (50)                       | 5 (33.3)                 | 0.263             |
| <b>Total Amphotericin days</b>          |                          |                               |                          | <b>0.015</b>      |
| Not given                               | 5 (8.5)                  | 1 (2.3)                       | 4 (26.7)                 |                   |
| ≤ 21 days                               | 30 (50.8)                | 20 (45.5)                     | 10 (66.7)                |                   |
| > 21 days                               | 24 (40.7)                | 23 (52.3)                     | 1 (6.7)                  |                   |
| Median (IQR)                            | 21 (14, 27)              | 22 (15, 28)                   | 10 (6, 21)               | <b>0.004</b>      |
| Posaconazole                            | 58 (98.3)                | 44 (100)                      | 14 (93.3)                | 0.254             |
| Isavuconazole                           | 5 (8.5)                  | 5 (11.4)                      | 0 (0.0)                  | 0.315             |
| Antibiotics given                       | 55 (93.2)                | 40 (90.9)                     | 15 (100.0)               | 0.564             |
| <b>Name of antibiotics</b>              |                          |                               |                          |                   |
| Amoxicillin-Clavulanate                 | 8 (13.6)                 | 8 (18.2)                      | 0 (0.0)                  |                   |
| Cefpodoxime                             | 1 (1.7)                  | 1 (2.3)                       | 0 (0.0)                  |                   |
| Colistin                                | 1 (1.7)                  | 0 (0.0)                       | 1 (6.7)                  |                   |
| Ceftriaxone-disodium edetate-sulbactam  | 2 (3.4)                  | 2 (4.5)                       | 0 (0.0)                  |                   |
| Cefoperazone-Sulbactam                  | 1 (1.7)                  | 1 (2.3)                       | 0 (0.0)                  |                   |
| Meropenem                               | 28 (47.5)                | 15 (34.0)                     | 13 (86.7)                |                   |
| Ceftriaxone                             | 3 (5.1)                  | 3 (6.8)                       | 0 (0.0)                  |                   |
| Cefuroxime                              | 1 (1.7)                  | 1 (2.3)                       | 0 (0.0)                  |                   |
| Piperacillin-Tazobactam                 | 10 (16.9)                | 9 (20.5)                      | 1 (6.7)                  |                   |
| <b>Surgical procedures</b>              |                          |                               |                          |                   |
| FESS                                    | 56 (94.9)                | 42(95.4)                      | 14(93.3)                 | 0.781             |
| Orbital decompression                   | 10 (16.9)                | 10 (22.7)                     | 0 (0.0)                  | 0.052             |
| Palatal clearance                       | 1 (1.7)                  | 1 (2.3)                       | 0 (0.0)                  | >0.999            |
| Exenteration                            | 13 (22)                  | 6 (13.6)                      | 7 (46.7)                 | <b>0.008</b>      |
| Maxillectomy                            | 9 (15.3)                 | 9 (20.5)                      | 0 (0.0)                  | 0.095             |
| Neurosurgery                            | 5 (8.5)                  | 3 (6.8)                       | 2 (13.3)                 | 0.593             |
| <b>Oxygenation and Ventilation data</b> |                          |                               |                          |                   |
| Nasal oxygen by prongs                  | 1 (1.7)                  | 0 (0.0)                       | 1 (6.7)                  | 0.254             |
| Nasal oxygen by face mask               | 0 (0.0)                  | 0 (0.0)                       | 0 (0.0)                  |                   |
| Nasal oxygen by NRBM                    | 5 (8.5)                  | 4 (9.1)                       | 1 (6.7)                  | >0.999            |
| NRBM (days) Median (IQR)                | 13 (12, 14)              | 13 (12, 14)                   | ND                       |                   |
| HFNO                                    | 0 (0.0)                  | 0 (0.0)                       | 0 (0.0)                  |                   |
| NIV                                     | 2 (3.4)                  | 0 (0.0)                       | 2 (13.3)                 | 0.061             |
| NIV (days) Median (IQR)                 | 2 (1, 2)                 | 0 (0, 0)                      | 2 (1, 2)                 | <b>0.015</b>      |
| Invasive mechanical ventilation (IMV)   | 8 (13.6)                 | 1 (2.3)                       | 7 (46.7)                 | <b>&lt;0.0001</b> |
| IMV (days) Median (IQR)                 | 3 (2, 4)                 | 3 (3, 3)                      | 3 (2, 4)                 | <b>&lt;0.0001</b> |

**ICU admissions**

|                              |           |          |           |                   |
|------------------------------|-----------|----------|-----------|-------------------|
| Required ICU                 | 18 (30.5) | 8 (18.2) | 10 (66.7) | <b>&lt;0.0001</b> |
| ICU stay (days) Median (IQR) | 3 (3, 6)  | 3 (2, 7) | 4 (3, 5)  | <b>&lt;0.0001</b> |

851 FESS – Functional endoscopic sinus surgery; NRBM – Non re-breathing mask; IQR- Interquartile range;

852 HFNO- High flow nasal oxygen; NIV- Non-invasive ventilation; IMV – Invasive mechanical ventilation.

853

854

855

856

857

858

859

860

861

862

863

864

865

866

867

868

869

870

871

872

873

874

875

876

877

878

879 **Table 6: Complications in Mucormycosis patients during antifungal therapy**

| <b>Complications in Mucormycosis</b> | <b>Total (N=59)<br/>n (%)</b> | <b>Discharged (n=44)<br/>n (%)</b> | <b>Death (n=15)<br/>n (%)</b> | <b>p-value</b>    |
|--------------------------------------|-------------------------------|------------------------------------|-------------------------------|-------------------|
| <b>Complications</b>                 |                               |                                    |                               |                   |
| Acute kidney injury                  | 30 (50.8)                     | 22 (50)                            | 8 (53.3)                      | 0.824             |
| Hypokalemia                          | 52 (88.1)                     | 40 (90.9)                          | 12 (80.0)                     | 0.355             |
| Hepatitis                            | 20 (33.9)                     | 12 (27.3)                          | 8 (53.3)                      | 0.066             |
| Fever                                | 46 (78.0)                     | 35 (79.5)                          | 11 (73.3)                     | 0.721             |
| Chills                               | 45 (76.3)                     | 34 (77.3)                          | 11 (73.3)                     | 0.757             |
| Loose motions                        | 14 (23.7)                     | 11 (25.0)                          | 3 (20.0)                      | >0.999            |
| Vomiting                             | 21 (35.6)                     | 15 (34.1)                          | 6 (40.0)                      | 0.680             |
| Loss of appetite                     | 46 (78.0)                     | 35 (79.5)                          | 11 (73.3)                     | 0.721             |
| Abdominal pain                       | 9 (15.3)                      | 5 (11.4)                           | 4 (26.7)                      | 0.213             |
| Abdominal Distension                 | 2 (3.4)                       | 1 (2.3)                            | 1 (6.7)                       | 0.447             |
| Thrombophlebitis                     | 35 (59.3)                     | 29 (65.9)                          | 6 (40.0)                      | 0.078             |
| Stomatitis                           | 20 (33.9)                     | 15 (34.1)                          | 5 (33.3)                      | 0.957             |
| Pedal edema                          | 14 (23.7)                     | 9 (20.5)                           | 5 (33.3)                      | 0.311             |
| Anemia                               | 34 (57.6)                     | 22 (50.0)                          | 12 (80.0)                     | 0.068             |
| Thrombocytopenia                     | 14 (23.7)                     | 6 (13.6)                           | 8 (53.3)                      | <b>0.002</b>      |
| Osteomyelitis                        | 11 (18.6)                     | 10 (22.7)                          | 1 (6.7)                       | 0.259             |
| Stroke/ Cerebritis                   | 15 (25.4)                     | 2 (4.5)                            | 13 (86.7)                     | <b>&lt;0.0001</b> |

880

881

882

883

884

885

886

887

888

889

890

891

892

893

894 **Table 7: Relative risk of death in Mucormycosis patients**

| Factors                                                                                         | Relative risk (95% CI)  | p-value           |
|-------------------------------------------------------------------------------------------------|-------------------------|-------------------|
| <b>Age &gt; 60 years</b> (Ref: ≤ 60 years)                                                      | 2.162 ((0.9300, 5.0251) | 0.098             |
| <b>Male</b> (Ref: Female)                                                                       | 0.702 (0.2708, 1.8205)  | 0.506             |
| <b>Diabetes Mellitus</b> (Ref: Diabetic)                                                        |                         |                   |
| Newly diagnosed/ pre-diabetic                                                                   | 0.353 (0.0887, 1.4048)  | 0.052             |
| <b>COVID-19 related factors</b>                                                                 |                         |                   |
| HRCT score ≥ 18 (Ref: < 18)                                                                     | 3.438 (1.6153, 7.3155)  | <b>0.017</b>      |
| Irrational use of steroids (Ref: Rational use)                                                  | 0.689 (0.2875, 1.6530)  | 0.407             |
| Not vaccinated against COVID-19<br>(Ref: vaccinated)                                            | 1.130 (0.3743, 3.4139)  | 0.822             |
| <b>Duration between 1st COVID-19 test and Mucormycosis diagnosis ≥ 15 days</b> (Ref: <15 days)  | 0.892 (0.3670, 2.1676)  | 0.803             |
| <b>Duration between COVID-19 discharge and Mucormycosis admission ≥ 15 days</b> (Ref: <15 days) | 0.671 (0.1764, 2.5556)  | 0.544             |
| <b>Type of Mucormycosis</b> (Ref: Rhino only)                                                   |                         |                   |
| Rhinal + Orbital                                                                                | 0.455 (0.0690, 3.0048)  | 0.259             |
| Rhinal + Orbital + Cerebral                                                                     | 5.440 (1.7140, 17.2662) | <b>0.0004</b>     |
| <b>Symptoms of Mucormycosis</b><br>(Ref: No symptom)                                            |                         |                   |
| Facial pain                                                                                     | 0.810 (0.3246, 2.0187)  | 0.663             |
| Facial swelling                                                                                 | 2.167 (0.7794, 6.0234)  | 0.098             |
| Headache                                                                                        | 1.023 (0.3802, 2.7539)  | 0.964             |
| Eye swelling                                                                                    | 5.121 (1.2665, 20.7087) | <b>0.002</b>      |
| Eye pain                                                                                        | 4.138 (1.3003, 13.1684) | <b>0.003</b>      |
| Loss of vision                                                                                  | 7.238 (2.2978, 22.8006) | <b>&lt;0.0001</b> |
| Ptosis                                                                                          | 3.619 (1.4252, 9.1899)  | <b>0.005</b>      |
| Deviation of angle of mouth                                                                     | 1.662 (0.5140, 5.3715)  | 0.482             |
| Nasal discharge                                                                                 | 0.451 (0.1148, 1.7733)  | 0.146             |
| Limb weakness                                                                                   | 3.927 (1.9784, 7.7961)  | <b>0.001</b>      |
| Toothache                                                                                       | 0.296 (0.0932, 0.9422)  | <b>0.012</b>      |
| <b>Investigations in Mucormycosis</b>                                                           |                         |                   |
| Diabetic Ketoacidosis (Ref: No)                                                                 | 3.267 (1.5012, 7.1085)  | <b>0.011</b>      |
| Blood urea level                                                                                | 1.023 (1.0013, 1.0452)  | <b>0.0002</b>     |
| ALC ≥ 1000 (Ref: < 1000)                                                                        | 0.379 (0.1531, 0.9422)  | 0.065             |
| Procalcitonin > 2 (Ref: ≤ 2)                                                                    | 1.507 (0.5467, 4.1513)  | 0.460             |
| C-reactive Protein ≥ 50 (Ref: < 50)                                                             | 3.438 (0.4949, 23.8759) | 0.063             |
| Ferritin > 1000 (Ref: ≤ 1000)                                                                   | 2.436 (0.7011, 8.4634)  | 0.153             |
| D-Dimer > 252 (Ref: ≤ 252)                                                                      | 1.286 (0.3315, 4.9860)  | 0.697             |
| <b>Treatment days in Mucormycosis</b><br>(Ref: ≤ 21 days)                                       |                         |                   |
| Total Amphotericin days > 21 days                                                               | 0.125 (0.0172, 0.9093)  | <b>0.002</b>      |
| Posaconazole > 21 days                                                                          | 0.364 (0.1293, 1.0228)  | 0.055             |
| <b>Complications in Mucormycosis</b><br>(Ref: No complication)                                  |                         |                   |
| Hepatitis                                                                                       | 2.229 (0.9437, 5.2628)  | 0.079             |
| Thrombophlebitis                                                                                | 0.457 (0.1872, 1.1164)  | 0.083             |
| Anemia                                                                                          | 2.941 (0.9267, 9.3351)  | 0.067             |

|     |                                |                          |                   |
|-----|--------------------------------|--------------------------|-------------------|
|     | Thrombocytopenia               | 3.674 (1.6211, 8.3244)   | <b>0.004</b>      |
|     | Stroke/ Cerebritis             | 19.067 (4.8522, 74.9224) | <b>&lt;0.0001</b> |
| 895 | ALC- Absolute lymphocyte count |                          |                   |

---

896

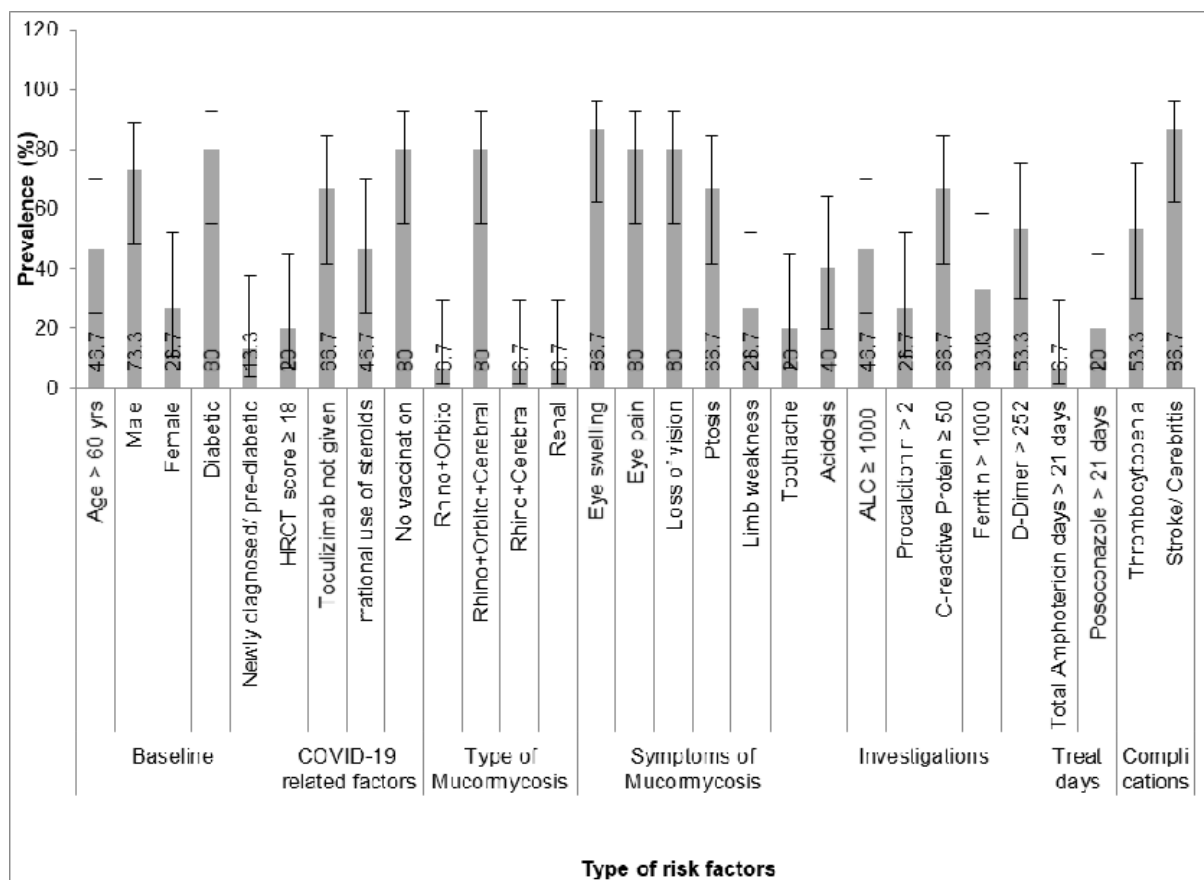

897

898 Figure 1: Prevalence of risk factors in Mucormycosis patients who died

899

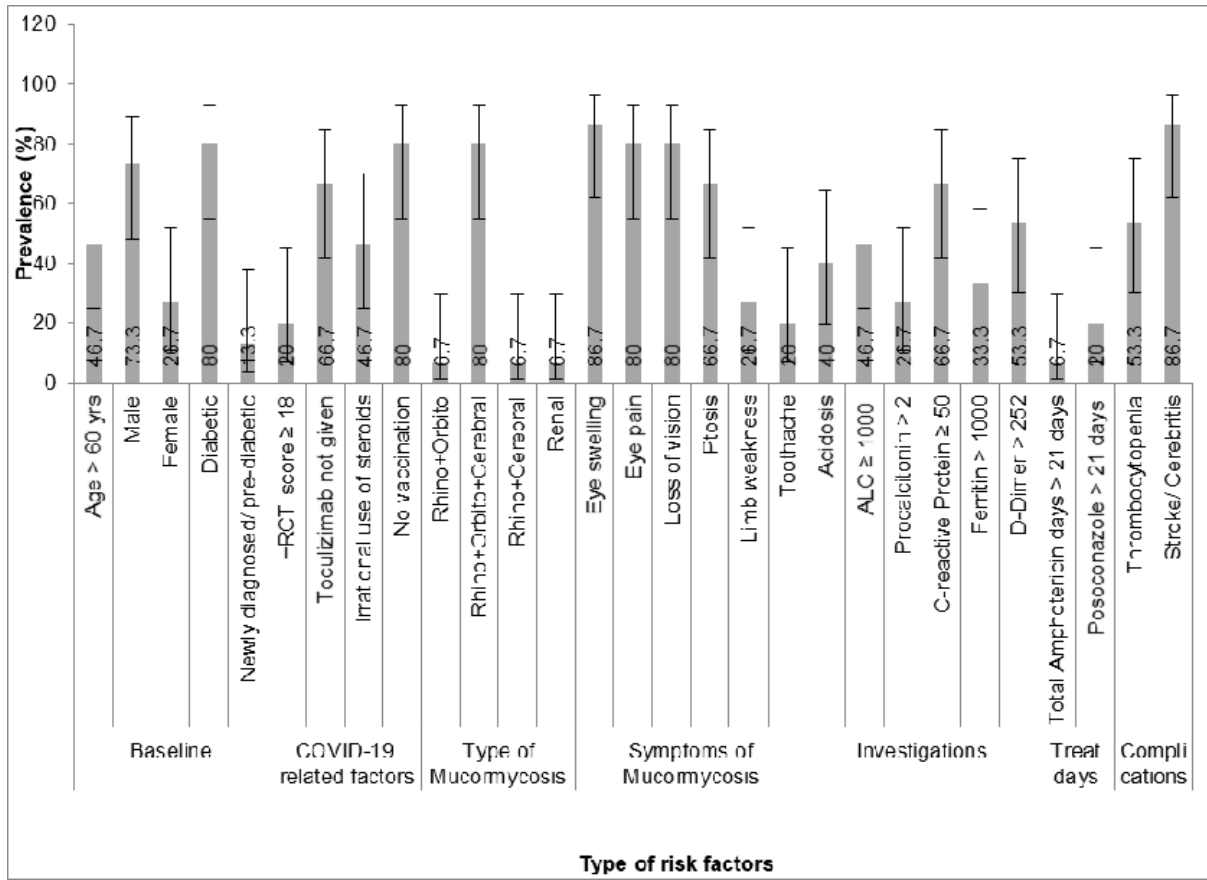

Figure 1: Prevalence of risk factors in Mucormycosis patients who died
